# Supplementary material for: A chemically stable cucurbit[6]uril-based hydrogen-bonded organic framework for potential SO2/CO2 separation
Source: Royal Society of Chemistry journal article supplement (doi:10.1039/d0ta07457h), 2020-01-01
Supplement: d0ta07457h1.pdf [file d0ta07457h1.pdf]

Electronic supplementary information (ESI) for

## A chemically stable hydrogen-bonded organic framework for SO<sub>2</sub>/CO<sub>2</sub> separation

Jun Liang,<sup>a,b</sup> Shang–Hua Xing,<sup>a,b</sup> Philipp Brandt,<sup>b</sup> Alexander Nuhnen,<sup>b</sup> Carsten Schlüsener,<sup>b</sup> Yang–Yang Sun,<sup>b</sup> and Christoph Janiak\*<sup>a,b</sup>

<sup>a</sup> Hoffmann Institute of Advanced Materials, Shenzhen Polytechnic, 7098 Liuxian Blvd, Nanshan District, Shenzhen, China

<sup>b</sup> Institut für Anorganische Chemie und Strukturchemie, Heinrich–Heine–Universität Düsseldorf, Universitätsstraße 1, 40225 Düsseldorf, Germany

Additional Emails: [liangj@uni-duesseldorf.de](mailto:liangj@uni-duesseldorf.de); [xingshanghua@126.com](mailto:xingshanghua@126.com); [p.brandt@hhu.de](mailto:p.brandt@hhu.de); [Alexander.Nuhnen@uni-duesseldorf.de](mailto:Alexander.Nuhnen@uni-duesseldorf.de); [carsten.schluesener@hhu.de](mailto:carsten.schluesener@hhu.de); [Yangyang.Sun@uni-duesseldorf.de](mailto:Yangyang.Sun@uni-duesseldorf.de)

### Table of Contents

#### S1. Experimental Details

1. Materials
2. Characterization methods
3. Preparation of nanoCB6-H and CB6-H
4. Gas sorption measurements

#### S2. Computational details

1. Virial analysis for SO<sub>2</sub>
2. IAST calculations
3. Molecular simulation
4. Breakthrough simulations

#### S3. Fig. S1–S31

**Fig. S1** TEM images and SEM images of nanoCB6-H crystals.

**Fig. S2** PXRD patterns of nanoCB6-H at different temperature under air.

**Fig. S3** TGA curve of nanoCB6-H at different temperature under air.

**Fig. S4** The pore size distributions of nanoCB6-H before and after SO<sub>2</sub> sorption.

**Fig. S5** SO<sub>2</sub> uptake isotherms of recycled nanoCB6-H measured up to 1 bar at 273 K and 293 K.

**Fig. S6** Comparison of SO<sub>2</sub> uptakes of nanoCB6-H and representative MOFs at 0.1 bar.

**Fig. S7** Comparison of SO<sub>2</sub> uptakes of nanoCB6-H and representative MOFs at 1.0 bar.

**Fig. S8** CO<sub>2</sub> uptake isotherms of recycled nanoCB6-H measured up to 1 bar at 273 K and 293 K.

**Fig. S9** CH<sub>4</sub> uptake isotherms of nanoCB6-H measured up to 1 bar at 273 K and 293 K.

**Fig. S10** N<sub>2</sub> uptake isotherms of nanoCB6-H measured up to 1 bar at 273 K and 293 K.

**Fig. S11** Virial analysis of the SO<sub>2</sub> sorption data for nanoCB6-H

**Fig. S12** Virial analysis of the CO<sub>2</sub> sorption data for nanoCB6-H.

**Fig. S13** Virial analysis of the CH<sub>4</sub> sorption data for nanoCB6-H.

**Fig. S14** Virial analysis of the N<sub>2</sub> sorption data for nanoCB6-H.

**Fig. S15** The automatic isotherm parameters of SO<sub>2</sub> (blue curve) and CO<sub>2</sub> (green curve) fitted by the Dual Site Langmuir (DSLAI) model (top).

**Fig. S16** The revised isotherm parameters of SO<sub>2</sub> and CO<sub>2</sub> re-fitted by Dual Site Langmuir model (top).

**Fig. S17** The IAST prediction calculation result for SO<sub>2</sub>/CO<sub>2</sub> mixture based on the revised fitted isotherm parameters from the fit presented in Fig. SY (top). The IAST SO<sub>2</sub>/CO<sub>2</sub> selectivity result (bottom).

**Fig. S18** IAST selectivities of recycled nanoCB6-H for SO<sub>2</sub>/CO<sub>2</sub> mixtures with varying volume ratio from 10:90 to 50:50 (v/v) at 293 K and 1 bar.

**Fig. S19** SO<sub>2</sub>/CO<sub>2</sub> selectivity of recycled nanoCB6-H and representative MOFs for gas mixtures.

- Fig. S20** IAST selectivities of recycled nanoCB6-H for SO<sub>2</sub>/CH<sub>4</sub> mixtures with varying SO<sub>2</sub> molar fractions in gas phase at 293 K and 1 bar.
- Fig. S21** IAST selectivities of recycled nanoCB6-H for SO<sub>2</sub>/N<sub>2</sub> mixtures with varying SO<sub>2</sub> molar fractions in gas phase at 293 K and 1 bar.
- Fig. S22** SO<sub>2</sub> adsorption isotherms of newly activated nanoCB6-H for only the first run measured up to 1 bar at 273 K and 293 K.
- Fig. S23** Isothermic heat of adsorption of SO<sub>2</sub> for newly activated nanoCB6-H materials based on the first runs data (grey), and recycled nanoCB6-H materials based on the recycled runs data (brown).
- Fig. S24** Virial analysis of the SO<sub>2</sub> sorption data from the first runs with newly prepared and activated nanoCB6-H samples.
- Fig. S25** a) PXRD patterns, b) N<sub>2</sub> sorption isotherms (77 K) of nanoCB6-H before and after SO<sub>2</sub> sorption for the first run at 293 K. c) The SO<sub>2</sub> sorption isotherms of nanoCB6-H for the first and second runs. Note: nanoCB6 was activated at 150 °C under a dynamic vacuum for 2 days.
- Fig. S26** SO<sub>2</sub> and CO<sub>2</sub> uptake isotherms of recycled nanoCB6-H samples measured up to 0.97 bar at 353 K.
- Fig. S27** Simulated breakthrough curves for nanoCB6-H with SO<sub>2</sub>/CO<sub>2</sub>/N<sub>2</sub>; 0.1/15.0/84.9; v:v:v at 293 K.
- Fig. S28** Chemical view of the void volume based on the accessible surface in a unit cell of CB6 H.
- Fig. S29** Chemical view of a pair of SO<sub>2</sub> molecules encapsulated in the intrinsic pore of a CB6 cage.
- Fig. S30** FTIR spectra of nanoCB6-H and nanoCB6-H after uptake of SO<sub>2</sub> under atmosphere condition.
- Fig. S31** FTIR spectra of nanoCB6-H, nanoCB6-H after uptake of SO<sub>2</sub>, and the recycled nanoCB6-H materials.
- Fig. S32** a) PXRD patterns of CB6-H before and after SO<sub>2</sub> uptake at 293 K up to 0.97 bar. b) The N<sub>2</sub> adsorption isotherms (77 K) of CB6-H. The SEM images of CB6-H c) before and d) after SO<sub>2</sub> uptake at 293 K up to 0.97 bar.
- Fig. S33** Comparison of SO<sub>2</sub> sorption isotherms of nanoCB6-H and CB6-H up to 0.97 bar at 293 K for the first runs.
- Fig. S34** a) PXRD patterns and b) N<sub>2</sub> adsorption isotherms (77 K) of nanoCB6-H before and after exposure to humid HCl.

#### **S4. Table S1–S7**

**Table S1.** Textural properties of nanoCB6-H before and after dry SO<sub>2</sub> adsorption.

**Table S2.** Experimental results of gas adsorption in recycled nanoCB6-H.

**Table S3.** Parameters for DSLAI modelling on different gas adsorption isotherm of nanoCB6-H.

**Table S4.** IAST selectivity results of different gas mixtures at 293 K and 1 bar.

**Table S5.** SO<sub>2</sub> sorption and separation properties of nanoCB6-H and other representative adsorbents.

**Table S6.** SO<sub>2</sub> sorption and separation properties of representative MOF adsorbents.

**Table S7.** Representative non-covalent bonds between CB6 cage and SO<sub>2</sub> molecules, and bonding energies based on DFT calculations.

#### **S5. References**

## S1. Experimental Details

### 1. Materials

All starting materials and solvents were obtained from commercial sources. Hydrochloric acid (37 wt%), methanol (99.99%), urea (> 99.5%) were obtained from Sigma–Aldrich. Paraformaldehyde (95–100.5%) was bought from Carl roth. Glyoxal (40 wt% solution in H<sub>2</sub>O) was obtained from J&K company.

### 2. Characterization methods

**Powder X–ray diffraction patterns (PXRD).** All samples were measured over the  $2\theta$  range of 5 – 50° with a scan speed of 1.5° min<sup>-1</sup> on a Bruker D2 Phaser powder diffractometer equipped with a flat silicon, low background sample holder using Cu–K $\alpha$  radiation ( $\lambda = 1.5418 \text{ \AA}$ , 30 kV, 10 Ma, ambient temperature). Simulated patterns of CB6 H were calculated with CCDC Mercury 3.7 program using the single crystal data (CCDC no. 676880, Refcode KOBNEV).

**SEM and TEM.** High resolution scanning electron microscopy (SEM) image was recorded with a Jeol JSM–6510LV QSEM Advanced electron microscope with a LAB–6 cathode at 20 keV.

Transmission electron microscope (TEM) images were taken on a FEI TECNAI G2 F20 microscope at an accelerating voltage of 200 kV.

**FT–IR.** Fourier transform infrared (FT–IR) spectra of samples were recorded on a Bruker FT–IR Tensor 37 as attenuated total reflection in the range of 550–4000 cm<sup>-1</sup>. For IR measurement on nanoCB6-H with SO<sub>2</sub> adsorbate, nanoCB6-H powder was first degassed at 423 K for 24 hours before the dose of SO<sub>2</sub> by manual up to 350 Torr and held by 10 minutes, then the sample was backfilled with helium. The sample tube with SO<sub>2</sub>@nanoCB6-H powder was immediately put in a Dewar bottle with very limited amount of liquid N<sub>2</sub> for a short time (within two minutes) and the sample was poured out to measure IR spectra. For comparison, activated nanoCB6-H without SO<sub>2</sub> adsorption was also treated with the same procedure. SO<sub>2</sub>@nanoCB6-H powder was activated under vacuum at 423 K for two hours before the collection of IR spectra of recycled nanoCB6-H again.

**NMR.** The <sup>1</sup>H NMR was performed at AVANCE III Bruker Biospin spectrometer, operating at 300 MHz. **EA.** Elemental analyses of C, H, and N were carried out on an Elementar Vario EL III analyzer. **TGA.** Thermogravimetric analysis (TGA) were carried out with a Netzsch TG 209 F3 Tarsus in the range of 30 °C to 650 °C with a heating rate of 10 K min<sup>-1</sup> under oxygen atmosphere.

### 3. Preparation of nanoCB6-H and CB6-H

For gas sorption by porous adsorbents, it is recognized that the uptake amount can be affected by various factors including the pore size (the critical pore diameter) and overall particle size of the adsorbent material, as each uptake point is related to the equilibrium time at certain partial pressure. If the critical pore diameter of the adsorbent is close to the kinetic diameter of the adsorbate molecule, or the particle size of the adsorbent is relatively large, then this will lower the permeance, and longer equilibrium times are usually needed. Therefore, an uptake by an adsorbent with larger particle size could be under-determined under the same equilibrium time parameters. Taking this into consideration, we have chosen nanoscale particle sizes of CB6-H, termed nanoCB6-H in this work for investigation in order to facilitate the exposure of CB6 cages to SO<sub>2</sub> molecules, and to minimize the diffusion time effect as the portal size of CB6 (3.9 Å) is very close to the kinetic diameter of SO<sub>2</sub> (4.1 Å). micro-size crystallites of CB6-H were also prepared and investigated for comparison.

nanoCB6-H was prepared according to a reported method with modification.<sup>1a</sup> 250 mg CB6 was dissolved in 5 mL 6 M HCl after sonication for two minutes. Then the solution was filtered through membrane (20  $\mu\text{m}$ ). The obtained CB6 solution was rapidly poured into 25 mL methanol under string at 300 rpm, and kept stirring for two minutes. Transfer the white mixture into a 50 mL centrifugation tube, 5000 rpm for 5 minutes, and the upper solution was removed. 25 mL fresh methanol was added to disperse the solid under sonication, then being centrifugated at 5000 rpm for 5 minutes. This process was repeated one more time. Put the solid product in vacuum oven at 60 °C for 12 hours before cooling down to R.T, and grind slightly the product into powder, then put the powder under dynamic vacuum oven at 100 °C for 48 hours. Elemental analysis data for nanoCB6-H. Calcd (%) for  $\text{C}_{36}\text{H}_{36}\text{N}_{24}\text{O}_{12}\cdot 1.8\text{H}_2\text{O}$ : C, 42.01; H, 3.88; N, 32.66. Found: C, 41.94; H, 4.34; N, 31.18. <sup>1</sup>H NMR, (300 MHz,  $\text{D}_2\text{O}/\text{KCl}$ , 25 °C):  $\delta$  (ppm) = 5.83–5.78 (d, 12H, N–CH<sub>2</sub>–N), 5.72 (s, 12H, –CH–), 4.48–4.43 (d, 12H, N–CH<sub>2</sub>–N). FT–IR characteristics (KBr,  $\nu_{\text{max}}$ ,  $\text{cm}^{-1}$ ): 3471 (w, H<sub>2</sub>O), 2999, 2927 (w, C–H), 1734 (w, C=O), 1476 (s, CH<sub>2</sub>), 1329 (s), 1236 (s), 1190 (s), 966 (s), 800 (s). CB6-H was prepared according to previous report,<sup>1c</sup> and characterized by PXRD and N<sub>2</sub> sorption at 77 K (Fig. S32).

#### 4. Gas sorption measurements

SO<sub>2</sub>, CO<sub>2</sub>, CH<sub>4</sub> and N<sub>2</sub> sorption isotherms for both newly activated and recycled nanoCB6-H materials were recorded at 293 K (water bath with temperature control system) and 273 K (ice/water bath) on a Quantachrome Autosorb IQ MP. Before the measurement, the nanoCB6-H samples were activated at 373 K in vacuum for 48 hours. In control experiments, nanoCB6-H or CB6-H was activated continuously at 423 K in vacuum for 48 hours. All gases were of ultrapure grades (99.999%) supplied by Air Liquide Germany and used as–received.

SO<sub>2</sub> sorption experiments were performed on an Autosorb iQ MP instrument within a pressure range of  $1\cdot 10^{-3}$ –1 bar. For safety precautions of toxic SO<sub>2</sub>, a *Dräger Pac 6000* SO<sub>2</sub>–detector (0–100 ppm in 0.1 ppm steps) was used in close range to the sorption–device. SO<sub>2</sub>–sorption experiments with our setup involve some limitations emerging from the corrosive nature of the SO<sub>2</sub> adsorptive. Each SO<sub>2</sub> sorption run had to be completed within a maximal time of 10 h. This time limit was specified by the Quantachrome company to prevent damage to the gaskets. Irreversible swelling of the SO<sub>2</sub> adsorbing gaskets in the measurement device could cause leaks in the system. Thus, the measurement time (10 hours at maximum) should be set to protect the device. After each measurement, the system had to be regenerated by flushing with nitrogen for at least five times, and remained under N<sub>2</sub> atmosphere for at least 12 hours to regenerate the gaskets. In the case of long equilibration times upon adsorption and desorption, we decided to collect the adsorption data points as complete as possible with long–enough equilibration times at the expense that fewer data points could be measured for desorption. This compromise then led to incomplete, i.e. not–closed desorption branches, which however are solely due to the experimental boundary conditions and cannot be interpreted in terms of decomposition or chemisorption. In SO<sub>2</sub> adsorption recycle experiments, recycled sample was degassed at 373 K under vacuum for at least two hours. For SO<sub>2</sub> adsorption at 353 K conditions, recycled sample after conducting SO<sub>2</sub> adsorption at 293 K for ten runs was used, and an oil bath with temperature control system was set up.

Nitrogen sorption measurements at 77 K were carried out on a Micrometrics ASAP 2020 or Autosorb 6 gas sorption analyzer. Before the measurement, the samples were activated at 373 K in vacuum for 48 hours. The Brunauer–Emmett–Teller (BET) surface areas were calculated based on a few points in the  $p/p_0$  range of 0.005–0.08 using the ASAP 2020 v3.05 software. Total pore volumes were calculated from nitrogen

adsorptions isotherms at  $p/p_o = 0.9$ . Micropore volumes were calculated based on t–plot method in the  $p/p_o$  range of 0.1–0.2. The pore size distributions were obtained using nonlocal density functional theory (NLDFT) calculations with an “N<sub>2</sub>–Tarazona, cylinder” model.

## S2. Computational details

### 1. Virial analysis for SO<sub>2</sub>

To calculate the isosteric enthalpy of adsorption ( $\Delta H_{ads}$ ) for SO<sub>2</sub> isotherm data, virial method was used. Equation (eq. 1) was used to fit the adsorption data simultaneously at 273 K and 293 K in Origin.

$$\ln(P) = \ln(n) + \frac{1}{T} \sum_{i=0}^n a_i n^i + \sum_{j=0}^m b_j m^j \quad (1)$$

In equation (1),  $P$  is the pressure in kPa,  $n$  is the total amount adsorbed in mmol g<sup>-1</sup>,  $T$  is the temperature in K (here 273K, 293K),  $a_i$  and  $b_j$  are virial coefficients, and  $n$ ,  $m$  represent the number of coefficients required to adequately fit the isotherms.

Then  $\Delta H_{ads}$  can be calculated from equation (eq. 2), where  $R$  is the universal gas constant.

$$\Delta H_{ads} = -Q_{st} = R \sum_{i=0}^n a_i n^i \quad (2)$$

### 2. IAST calculations<sup>2</sup>

Selectivities of SO<sub>2</sub> over CO<sub>2</sub> of nanoCB6-H were calculated from the dual–site Langmuir (DSL) (eq. 3) fitted isotherm data.

$$q_{eq} = q_{m,1} \cdot \frac{K_1 \cdot p}{1 + K_1 \cdot p} + q_{m,2} \frac{K_2 \cdot p}{1 + K_2 \cdot p} \quad (3)$$

The 3P sim software (3P Instruments, Germany, version 1.1.0.7) calculates the maximal loadings of each gas depending on the given mole fraction.

IAST selectivities  $S$  of binary gas mixtures were calculated using equation 4, where  $x_i$  represents the absorbed gas amount and  $y_i$  the mole fraction of each adsorptive.

$$S = \frac{x_1/x_2}{y_1/y_2} \quad (4)$$

Selectivities of SO<sub>2</sub> over CH<sub>4</sub>, and SO<sub>2</sub> over N<sub>2</sub> of nanoCB6-H were calculated from the dual–site Langmuir (DSL) (eq. 3) fitted isotherm data. IAST with DSLangmuir isotherm mode was chosen, and the total pressure was fixed at 1 bar to give the IAST selectivity versus the SO<sub>2</sub> molar fractions between 0.01 and 0.5 bar in gas mixtures. Alternatively, SO<sub>2</sub> to CH<sub>4</sub> (or SO<sub>2</sub> to N<sub>2</sub>) volume ratio was fixed to give the IAST selectivity vs pressure between 0.1 to 1.0 bar based on eq.4.

### 3. Molecular simulation

All density functional theory (DFT) calculations were performed with Becke, three-parameter, Lee-Yang-Parr (B3LYP) functional by using Gaussian 16 software.<sup>3</sup> The initial configuration of CB6 was obtained from the single-crystal structure (CCDC no. 676880, Refcode KOBNEV). The geometric optimization of CB6 was carried out at the level of B3LYP/6-311G\*\* method. The same level of method for CB6 geometric optimization was also used on other literatures.<sup>4</sup> The SO<sub>2</sub> molecule was manually placed on the optimized CB6 configuration with different site, and then the fully relax optimizations of complex models SO<sub>2</sub>\_CB6 were

performed. The binding energy of SO<sub>2</sub> molecule with CB6 was calculated by the dispersion corrected B3LYP-D3 functional<sup>5</sup> along with 6-311G\*\*. The basis set superposition error (BSSE) was corrected by the counterpoise method.<sup>6</sup> The binding energy was thus obtained from the equation 5:

$$E(\text{binding energy}) = E(\text{SO}_2\text{-CB6}) - E(\text{CB6}) - E(\text{SO}_2) + E(\text{BSSE}) \quad (5)$$

where E(SO<sub>2</sub>-CB6) corresponds to the total energy of CB6 model with one SO<sub>2</sub> molecule, and E(CB6) and E(SO<sub>2</sub>) are the total energies of CB6 model without SO<sub>2</sub> and only one SO<sub>2</sub> molecule, respectively.

#### **4. Breakthrough simulations**

Breakthrough simulations were calculated using 3P sim software. The calculations were based on a 30 cm high column with an inner diameter of 3 cm, axial dispersion of 50 cm<sup>2</sup> min<sup>-1</sup> and a continuous gas flow of 20 mL min<sup>-1</sup>. Generally mass transfer coefficients in our dispersion model were set to 10 min<sup>-1</sup> for all gases.

S3. Fig. S1–S31

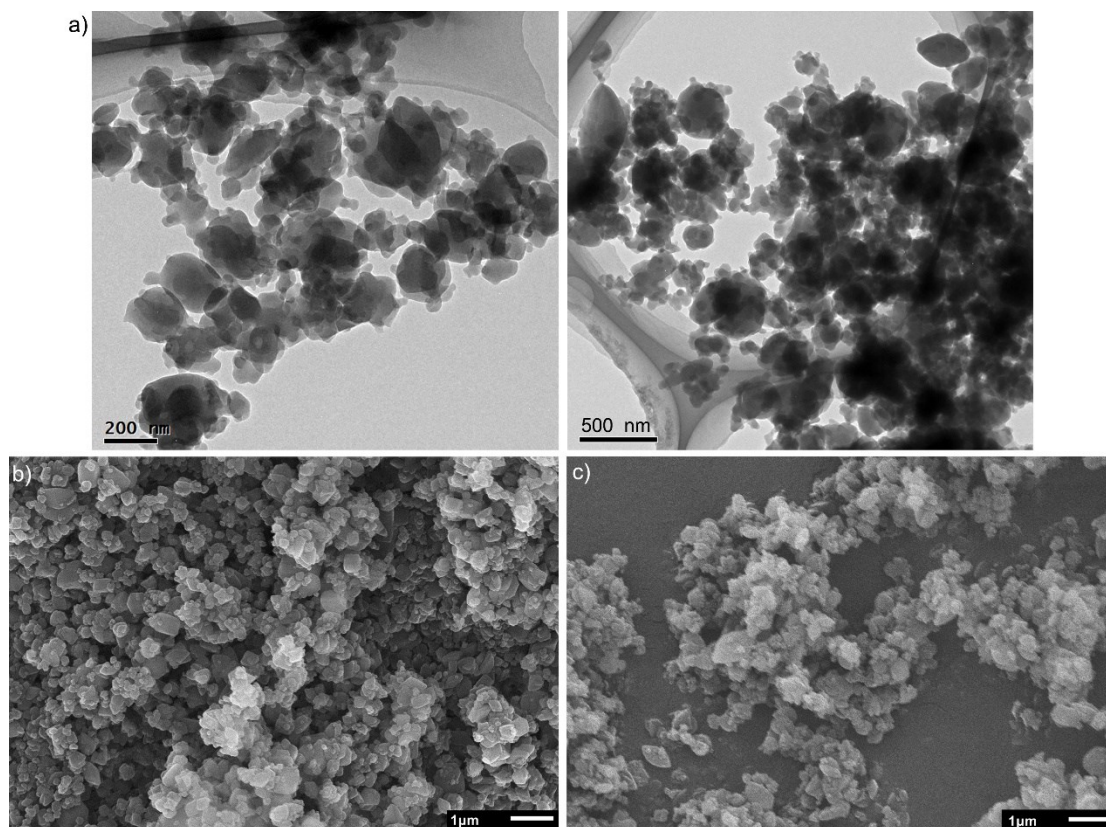

**Fig. S1** a) TEM images of nanoCB6-H with different magnification. SEM images of nanoCB6-H b) before and c) after SO<sub>2</sub> uptake at 293 K up to 0.97 bar.

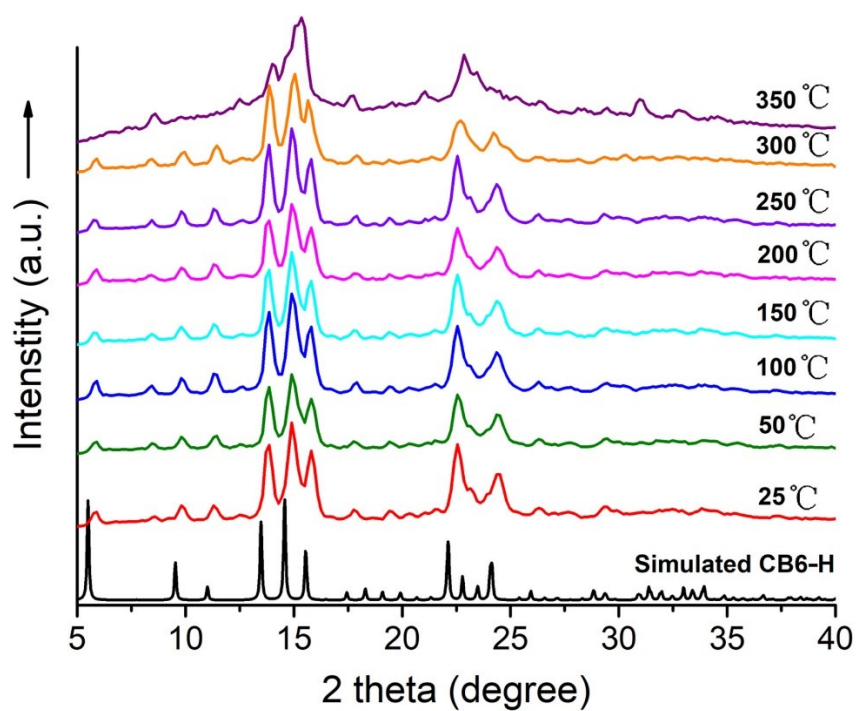

**Fig. S2** PXRD patterns of nanoCB6-H at different temperature under air.

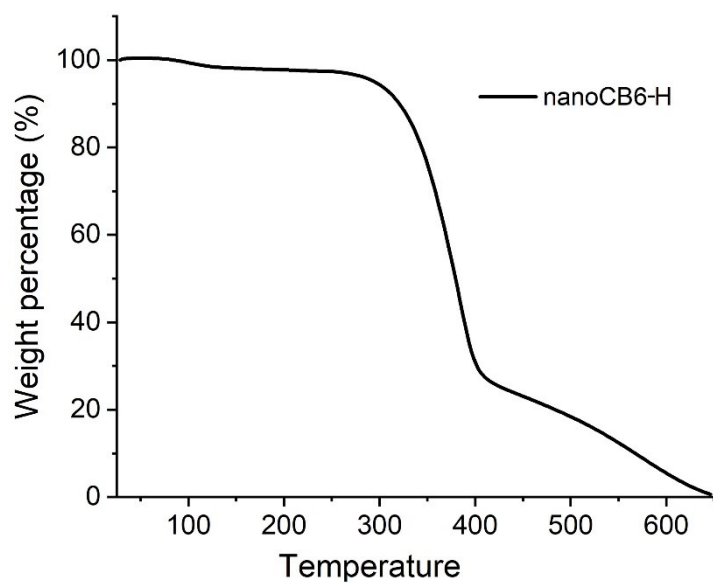

**Fig. S3** TGA curve of nanoCB6-H at different temperature under oxygen atmosphere.

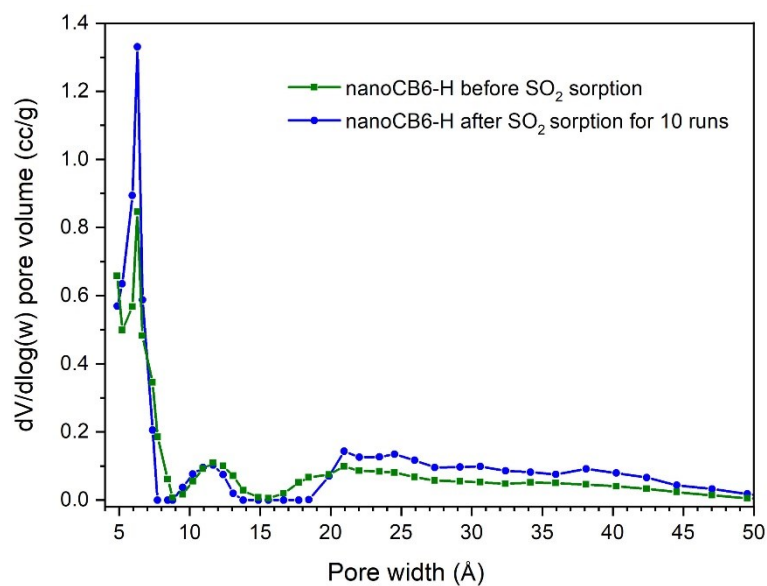

**Fig. S4** The pore size distributions of nanoCB6-H before SO<sub>2</sub> sorption (green) and after ten runs of SO<sub>2</sub> sorption (blue).



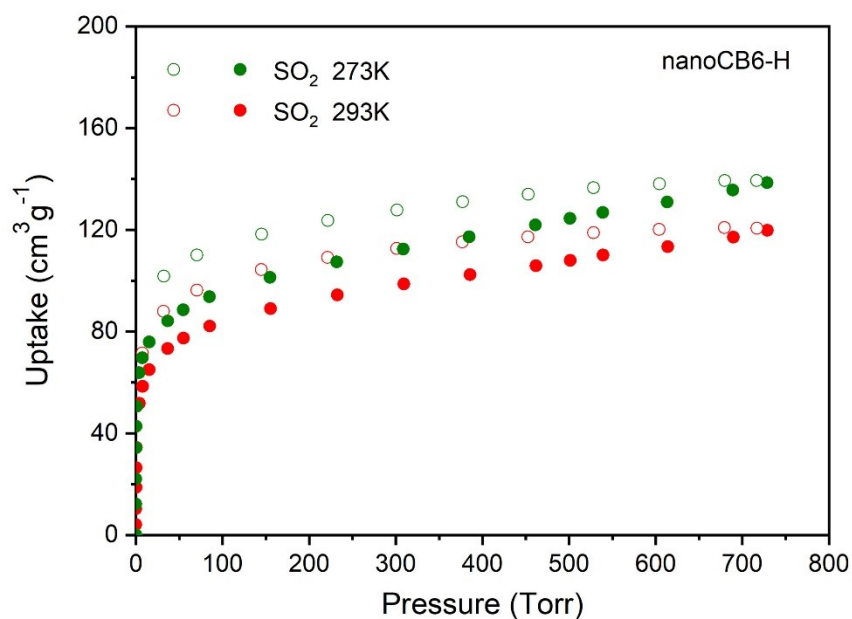

**Fig. S5** SO<sub>2</sub> uptake isotherms (the 7<sup>th</sup> and 8<sup>th</sup> runs) of recycled nanoCB6-H measured up to 1 bar at 293 K and 273 K, respectively. Filled and empty symbols represent adsorption and desorption, respectively.

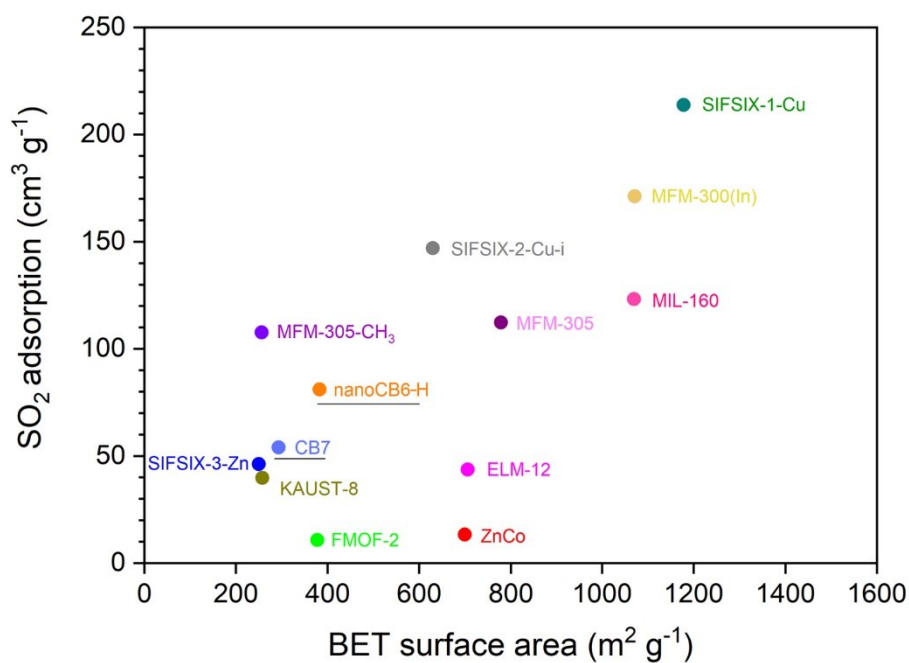

**Fig. S6** Comparison of SO<sub>2</sub> uptakes of nanoCB6-H and representative MOFs at 0.1 bar. Plot of SO<sub>2</sub> adsorption (at 0.1 bar and 298 K) against BET surface area. Temperature for nanoCB6-H and MIL-160 is at 293 K. Cage involved materials are underlined.

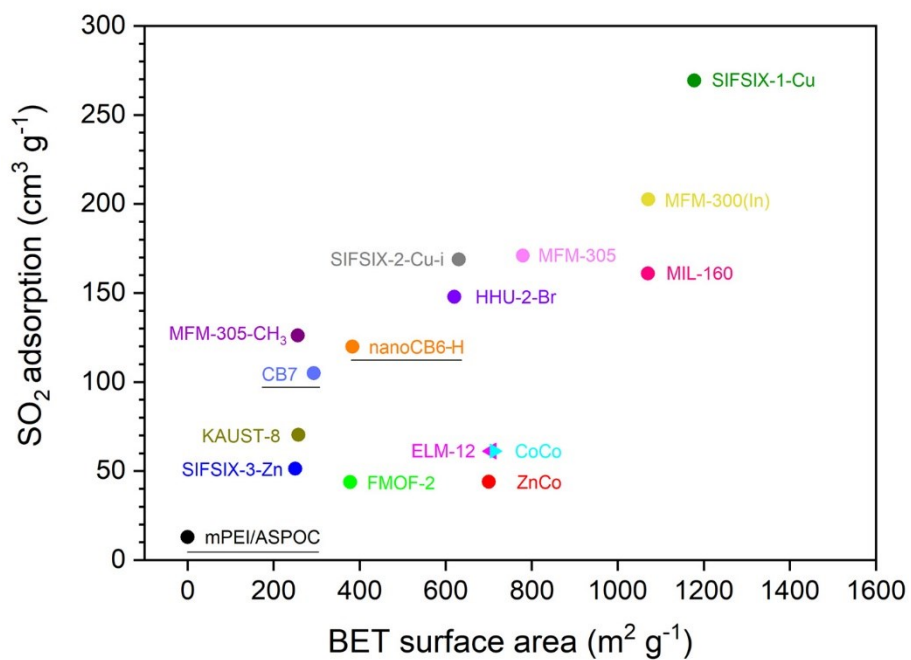

**Fig. S7** Comparison of SO<sub>2</sub> uptakes of nanoCB6-H and representative MOFs at 1.0 bar. Plot of SO<sub>2</sub> adsorption (at 1.0 bar and 298 K) against BET surface area. Temperature for nanoCB6-H and MIL-160 is at 293 K. Cage involved materials are underlined.

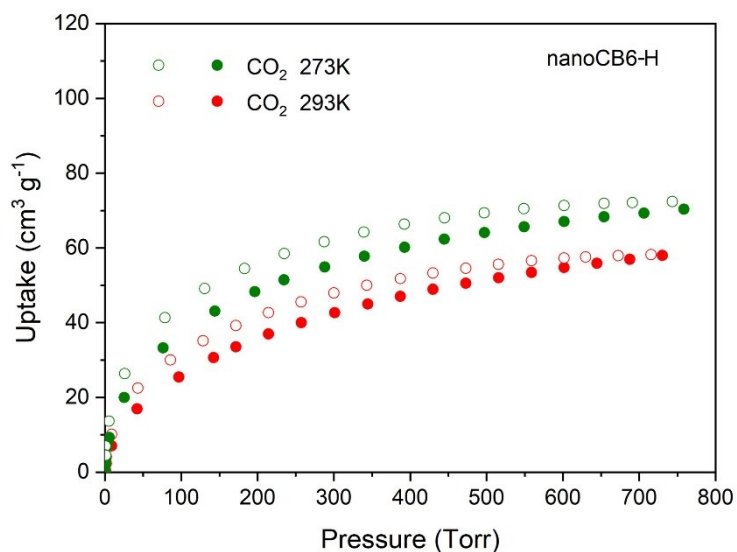

**Fig. S8** CO<sub>2</sub> uptake isotherms of recycled nanoCB6-H measured up to 1 bar at 273 K and 293 K, respectively. Filled and empty symbols represent adsorption and desorption, respectively.

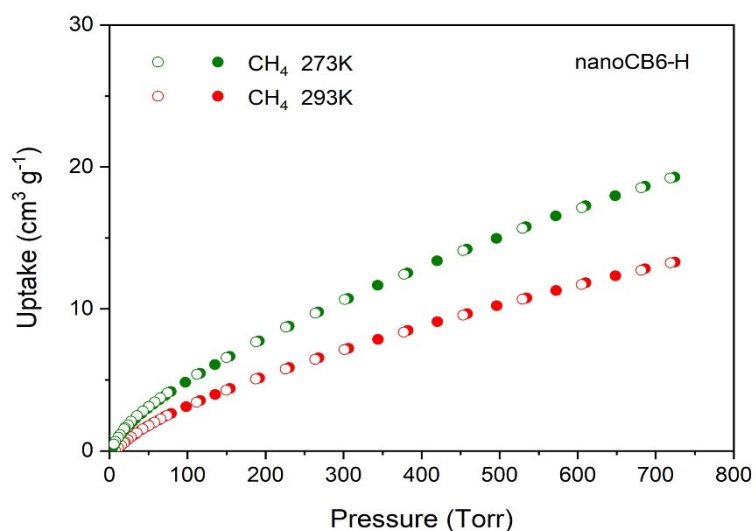

**Fig. S9** CH<sub>4</sub> uptake isotherms of nanoCB6-H measured up to 1 bar at 273 K and 293 K, respectively. Filled and empty symbols represent adsorption and desorption, respectively.

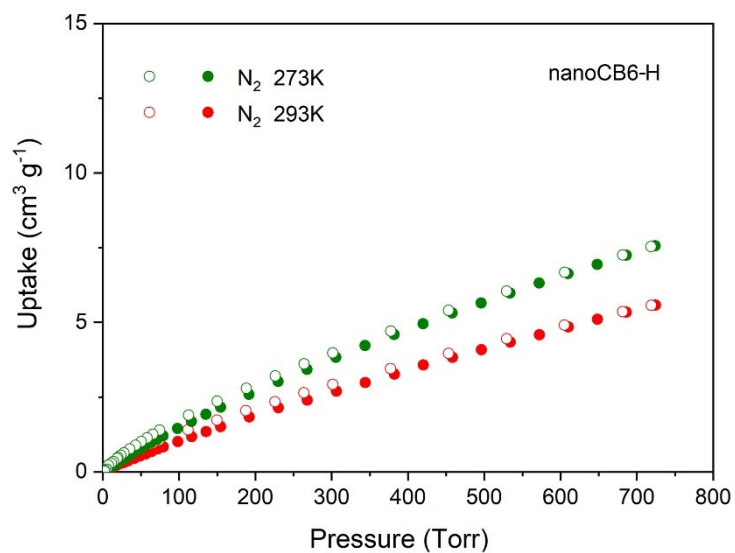

**Fig. S10** N<sub>2</sub> uptake isotherms of nanoCB6-H measured up to 1 bar at 273 K and 293 K, respectively. Filled and empty symbols represent adsorption and desorption, respectively.

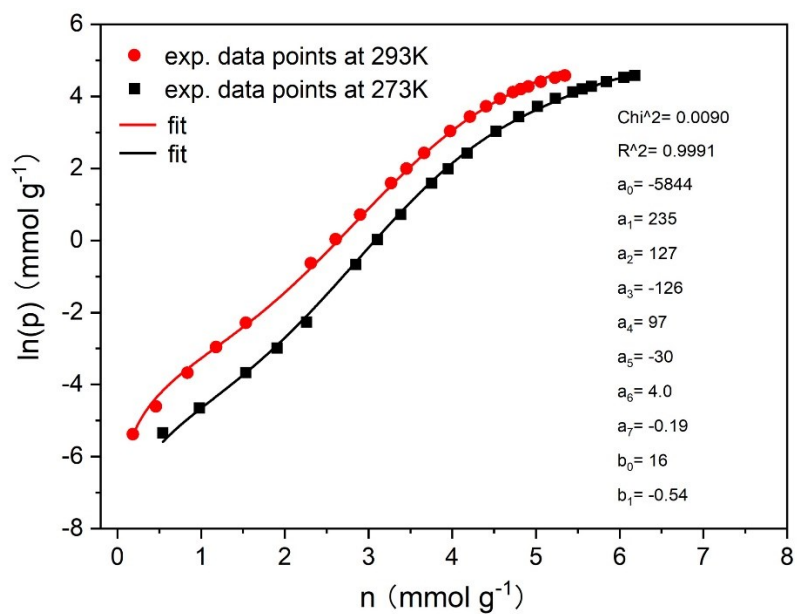

**Fig. S11** Virial analysis of the SO<sub>2</sub> sorption data for recycled nanoCB6-H.

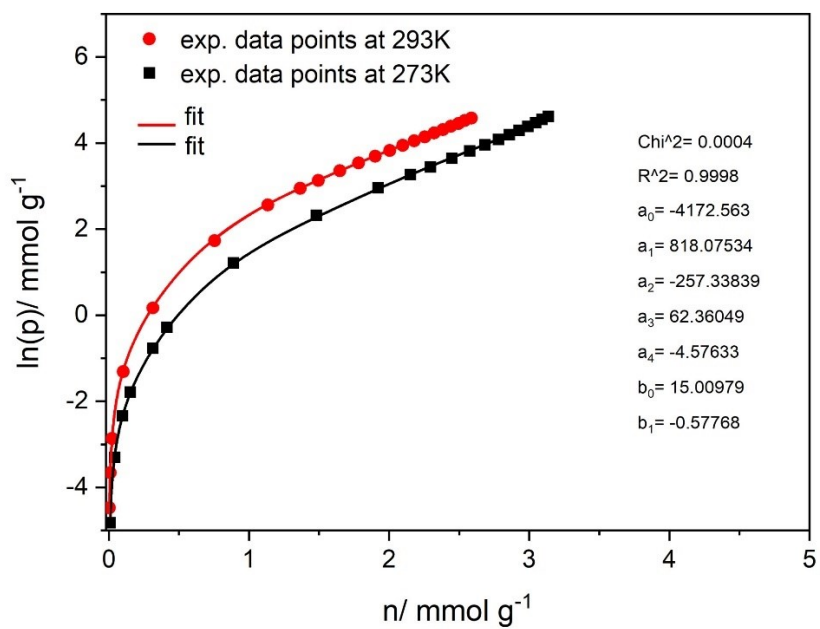

**Fig. S12** Virial analysis of the CO<sub>2</sub> sorption data for recycled nanoCB6-H.

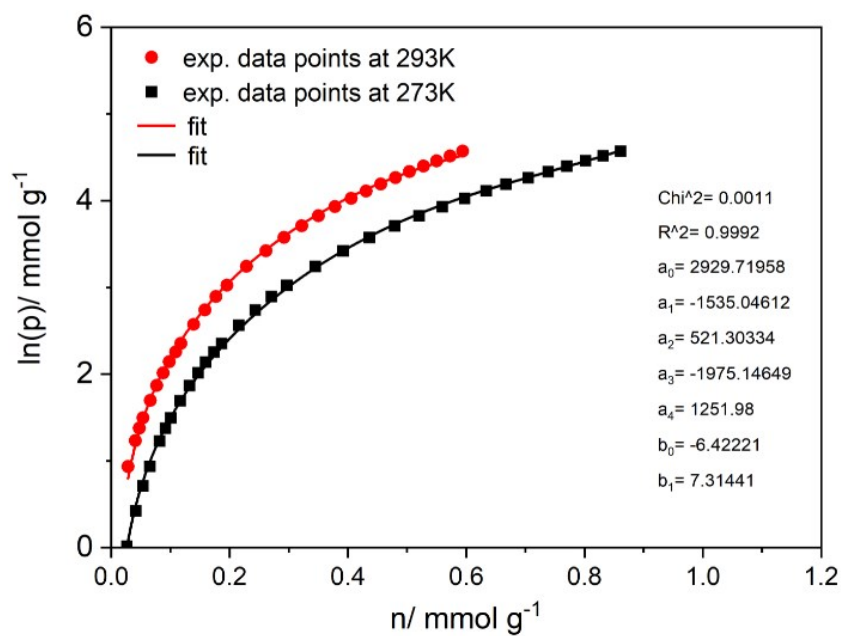

Fig. S13 Virial analysis of the CH<sub>4</sub> sorption data for nanoCB6-H.

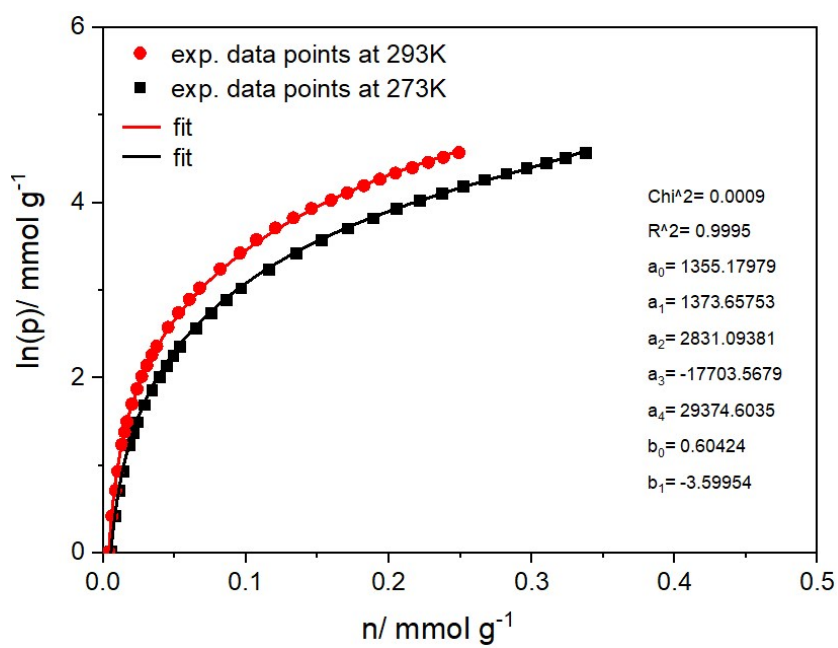

Fig. S14 Virial analysis of the N<sub>2</sub> sorption data for nanoCB6-H.

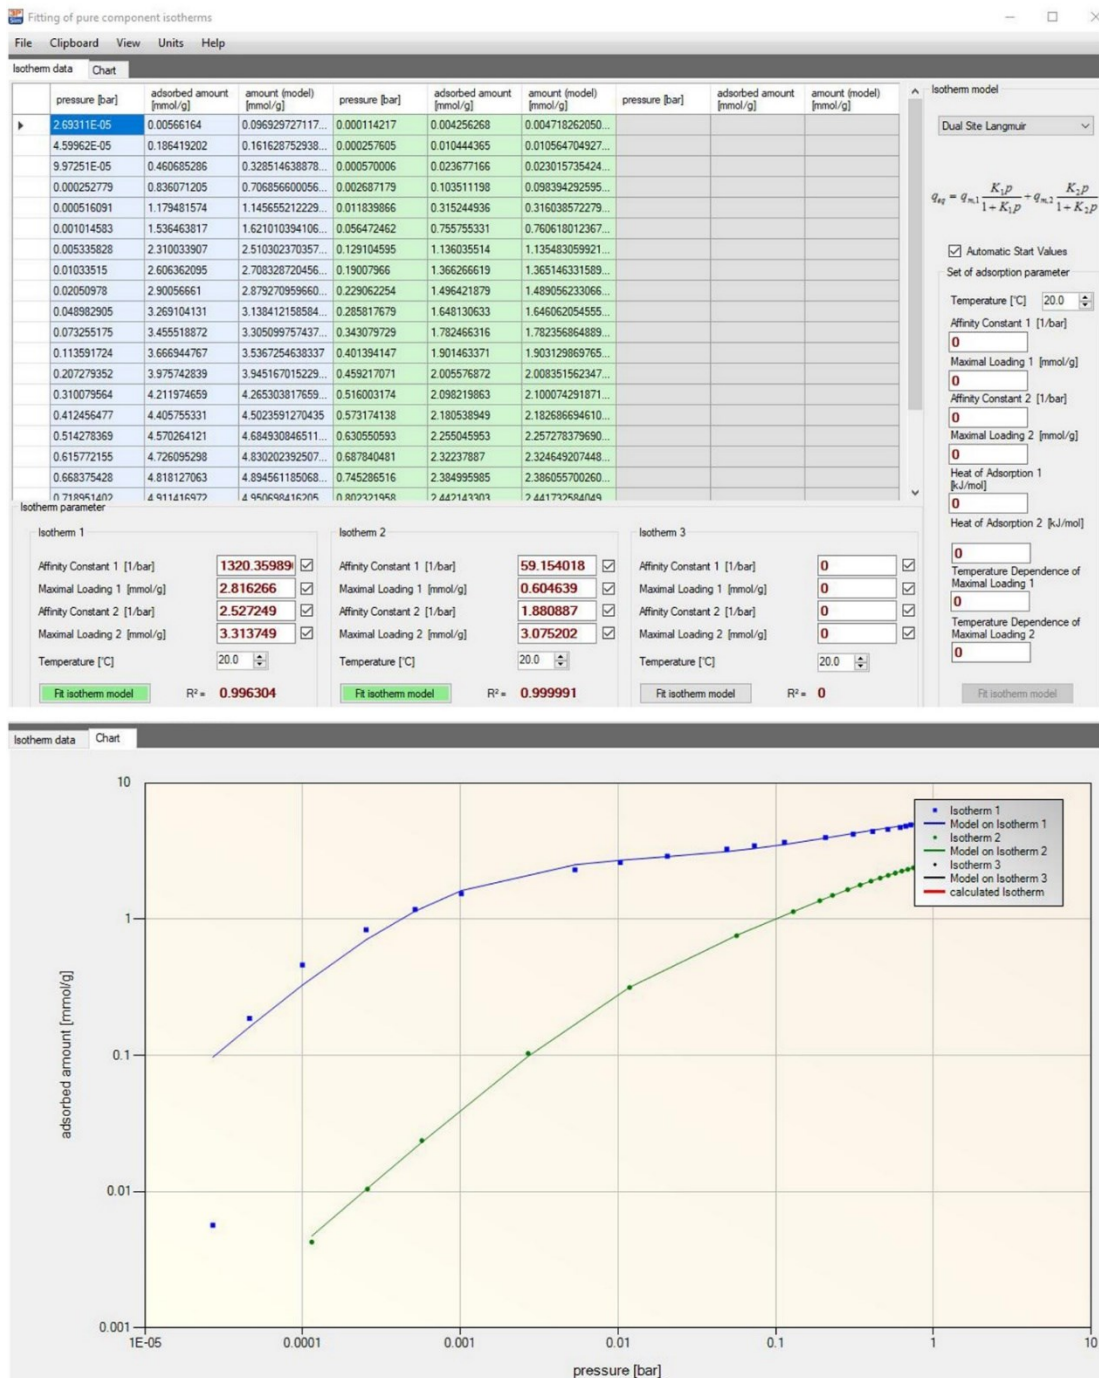

**Fig. S15** The automatic isotherm parameters of SO<sub>2</sub> (blue curve) and CO<sub>2</sub> (green curve) fitted by the Dual Site Langmuir (DSLAI) model (top). The corresponding fitting results of chart with log(x) and log(y) for better visualization (bottom).

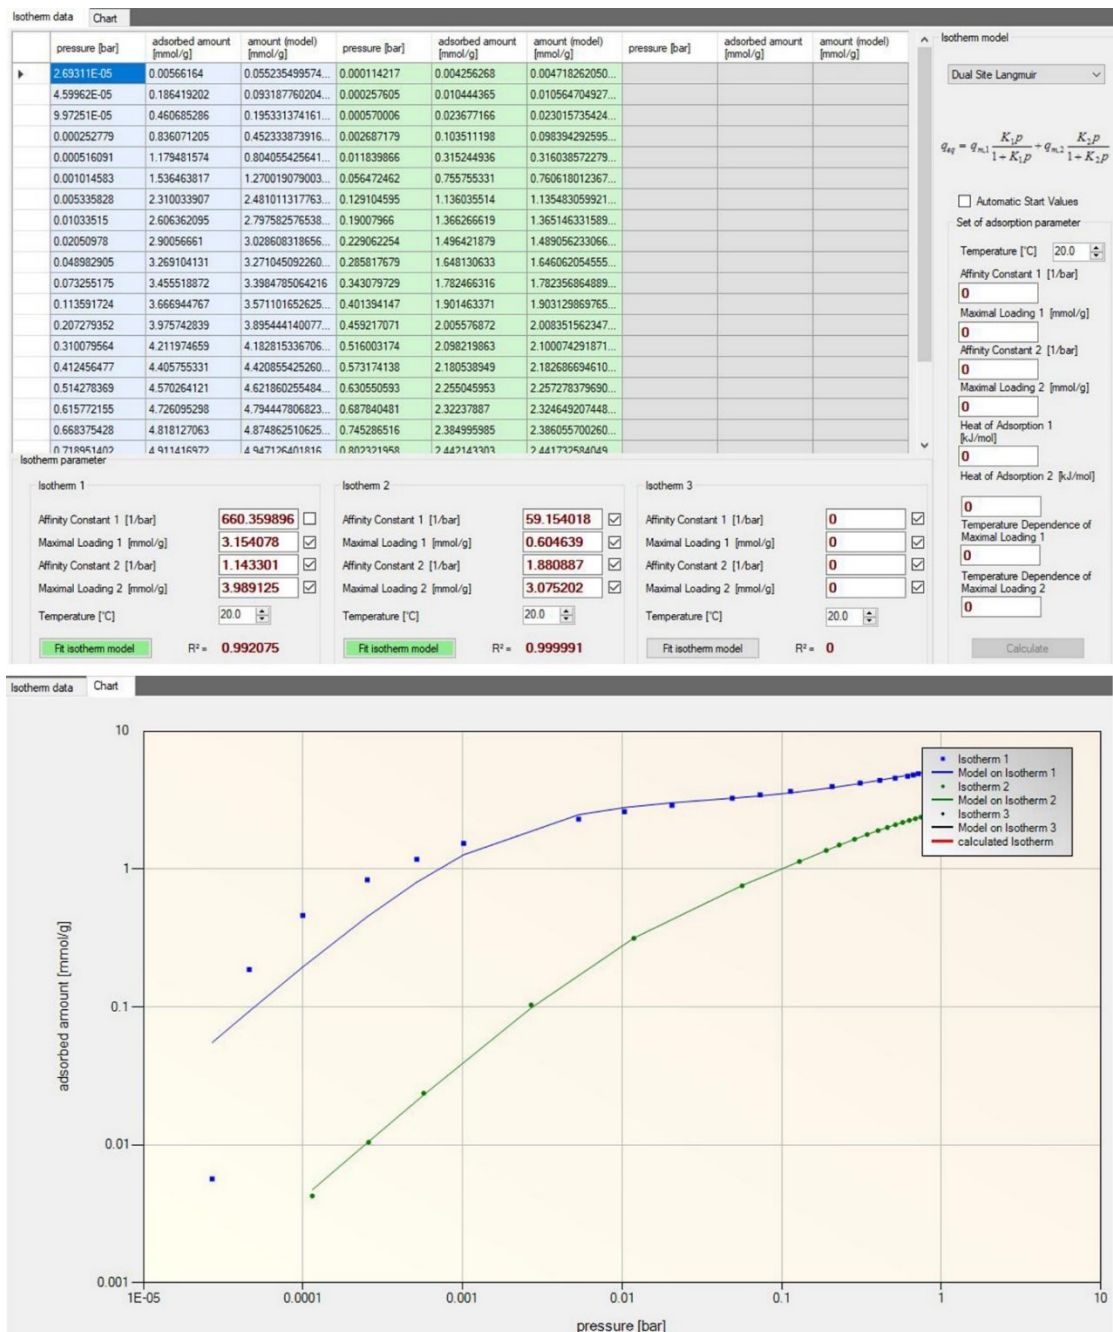

**Fig. S16** The revised isotherm parameters of SO<sub>2</sub> and CO<sub>2</sub> re-fitted by Dual Site Langmuir model (top) by omitting the data below 0.01 bar which gave an 'Affinity constant 1' for SO<sub>2</sub> of 660 bar<sup>-1</sup>. The corresponding fitting results of chart with log(x) and log(y) for better visualization (bottom).

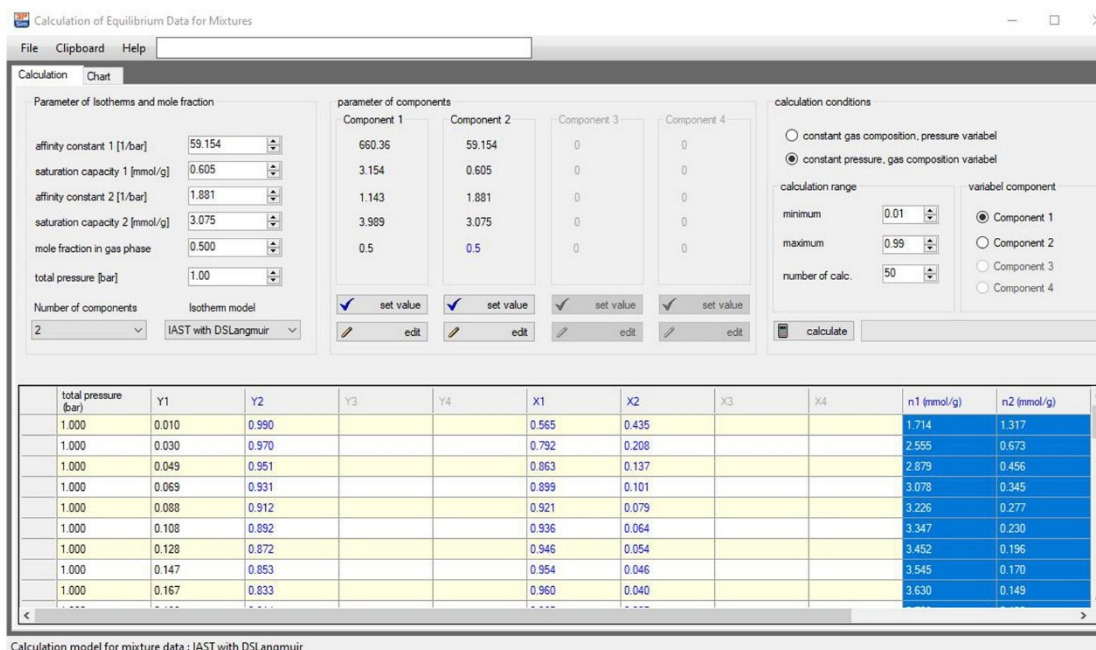

$f_x = \frac{(\$N8/\$O8)}{(\$L8/\$M8)}$

| molar fraction |       | x1 (mmol/g) |       | x2 (mmol/g) |    | IAST selectivity |
|----------------|-------|-------------|-------|-------------|----|------------------|
| y1             | y2    | x1          | x2    | x1          | x2 |                  |
| 0.01           | 0.99  | 1.714       | 1.317 | 128.8428246 |    |                  |
| 0.03           | 0.97  | 2.555       | 0.673 | 122.7513621 |    |                  |
| 0.049          | 0.951 | 2.879       | 0.456 | 122.5353115 |    |                  |
| 0.069          | 0.931 | 3.078       | 0.345 | 120.378828  |    |                  |
| 0.088          | 0.912 | 3.226       | 0.277 | 120.6970791 |    |                  |
| 0.108          | 0.892 | 3.347       | 0.230 | 120.1901771 |    |                  |
| 0.128          | 0.872 | 3.452       | 0.196 | 119.9834184 |    |                  |
| 0.147          | 0.853 | 3.545       | 0.170 | 121.0038015 |    |                  |
| 0.167          | 0.833 | 3.630       | 0.149 | 121.5203151 |    |                  |
| 0.186          | 0.814 | 3.709       | 0.133 | 122.0440618 |    |                  |
| 0.206          | 0.794 | 3.783       | 0.119 | 122.5300645 |    |                  |
| 0.226          | 0.774 | 3.852       | 0.107 | 123.2920354 |    |                  |
| 0.245          | 0.755 | 3.918       | 0.097 | 124.4725437 |    |                  |
| 0.265          | 0.735 | 3.98        | 0.088 | 125.441681  |    |                  |
| 0.284          | 0.716 | 4.04        | 0.08  | 127.3169014 |    |                  |
| 0.304          | 0.696 | 4.097       | 0.073 | 128.4927902 |    |                  |
| 0.324          | 0.676 | 4.151       | 0.067 | 129.2646029 |    |                  |
| 0.343          | 0.657 | 4.204       | 0.061 | 132.0091765 |    |                  |
| 0.363          | 0.637 | 4.254       | 0.057 | 130.9650573 |    |                  |
| 0.382          | 0.618 | 4.303       | 0.052 | 133.8730366 |    |                  |
| 0.402          | 0.598 | 4.35        | 0.048 | 134.8103234 |    |                  |
| 0.422          | 0.578 | 4.395       | 0.044 | 136.8111805 |    |                  |
| 0.441          | 0.559 | 4.438       | 0.041 | 137.2071235 |    |                  |
| 0.461          | 0.539 | 4.481       | 0.038 | 137.8729878 |    |                  |
| 0.48           | 0.52  | 4.522       | 0.035 | 139.9666667 |    |                  |
| 0.5            | 0.5   | 4.561       | 0.032 | 142.53125   |    |                  |

**Fig. S17** The IAST prediction calculation result for SO<sub>2</sub>/CO<sub>2</sub> mixture based on the revised fitted isotherm parameters from the fit presented in Fig. S16 (top). The IAST SO<sub>2</sub>/CO<sub>2</sub> selectivity result (bottom) with molar fraction as the x axis and IAST selectivity as y axis are plotted in Fig. 3a, main text.

In the initial calculation, the parameters were automatically obtained as the isotherm data appeared well fitted with the Dual Site Langmuir, DSLAI model. **Fig. S15** shows the previous fitting results of SO<sub>2</sub> and CO<sub>2</sub> isotherm data at 293 K up to 0.97 bar. The x and y axis are in logarithmic mode to visualize the fitting results at low pressure more clearly, and even the low-pressure data below 0.01 bar were fitted reasonably well and were included in the fit. We noticed that uncertainties could exist at the low-pressure range, and the very high 'Affinity constant 1' for SO<sub>2</sub> of 1321 bar<sup>-1</sup> was caused by the very steep adsorption curve below 0.01 bar (58 cm<sup>3</sup> g<sup>-1</sup> at 7.6 Torr).

In a modified fit, the isotherm data of each gas below 0.01 bar were omitted, with the remaining data fitted



with the DSLAI model to obtain parameters for the '3P sim' software by which we re-calculated the IAST selectivities for SO<sub>2</sub>/CO<sub>2</sub>, SO<sub>2</sub>/CH<sub>4</sub> and SO<sub>2</sub>/N<sub>2</sub>. By omitting the data below 0.01 bar, the 'Affinity constant 1' for SO<sub>2</sub> changed to about 660 bar<sup>-1</sup> (see **Fig. S16**). In addition, as shown in **Fig. S17**, the IAST selectivity calculation process for SO<sub>2</sub>/CO<sub>2</sub> is shown based on the equation (4) in the ESI†. As a result, a IAST selectivity of 120 at SO<sub>2</sub>:CO<sub>2</sub> (10:90, v:v) could still be obtained, which highlighted the potential of nanoCB6-H for SO<sub>2</sub> separation. Accordingly, the IAST selectivities of SO<sub>2</sub>/CH<sub>4</sub> and SO<sub>2</sub>/N<sub>2</sub>, and breakthrough simulation have also been recalculated.

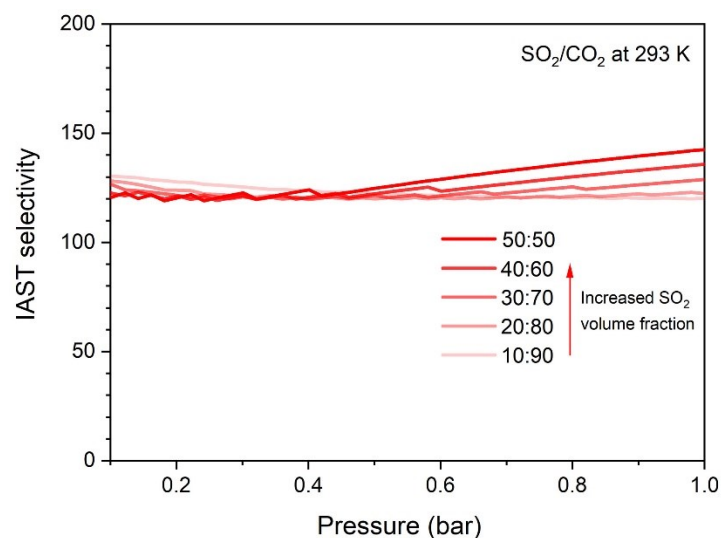

**Fig. S18** IAST selectivities of recycled nanoCB6-H for SO<sub>2</sub>/CO<sub>2</sub> mixtures with varying volume ratio from 10:90 to 50:50 (v/v) (light to dark colour) at 293 K. IAST calculations at low pressure (< 0.1 bar) carry large uncertainties due to the insufficient integration of spreading pressure and thus are not reported.

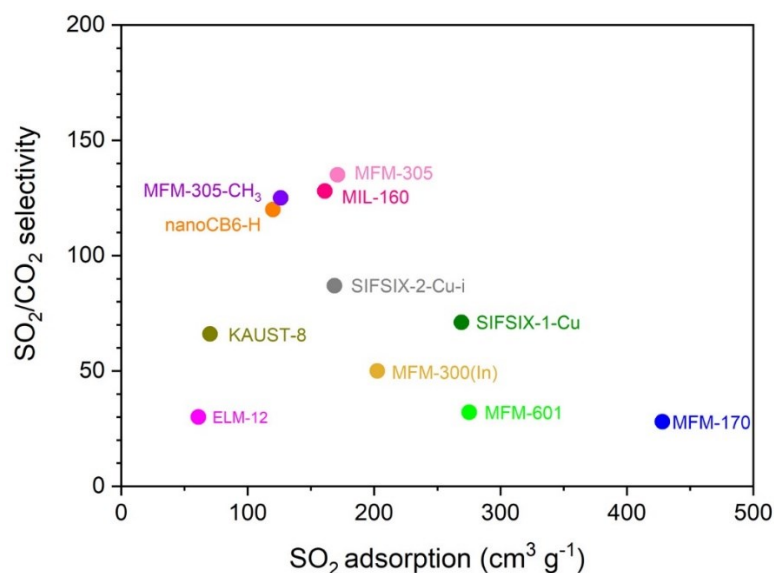

**Fig. S19** SO<sub>2</sub>/CO<sub>2</sub> selectivity of recycled nanoCB6-H and representative MOFs for gas mixtures with specific SO<sub>2</sub>:CO<sub>2</sub> molar ratio (between 0.05:99.95 and 10:90) at 1.0 bar (details in Table S6). Plot of SO<sub>2</sub>/CO<sub>2</sub> selectivity (at 1.0 bar and 298 K) against SO<sub>2</sub> adsorption. Temperature for nanoCB6-H and MIL-160 is at 293 K.

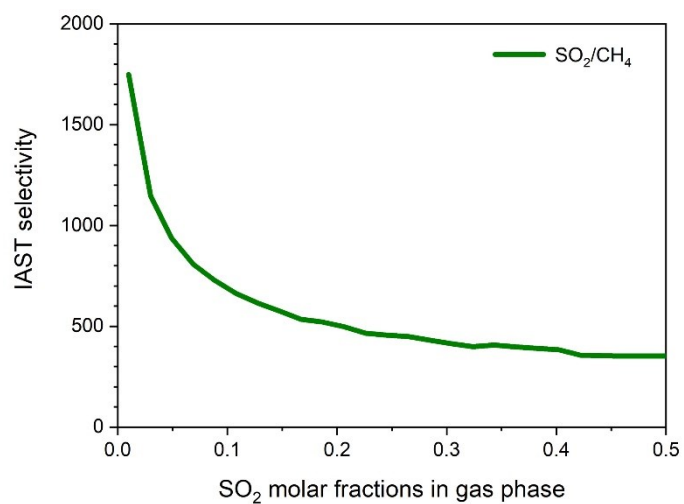

**Fig. S20** IAST selectivities of recycled nanoCB6-H for SO<sub>2</sub>/CH<sub>4</sub> mixtures with varying SO<sub>2</sub> molar fractions in the gas phase at 293 K and 1 bar.

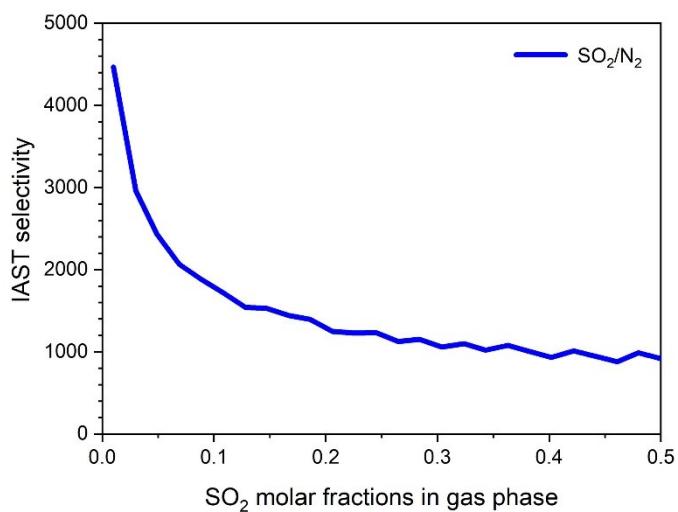

**Fig. S21** IAST selectivities of recycled nanoCB6-H for SO<sub>2</sub>/N<sub>2</sub> mixtures with varying SO<sub>2</sub> molar fractions in the gas phase at 293 K and 1 bar.

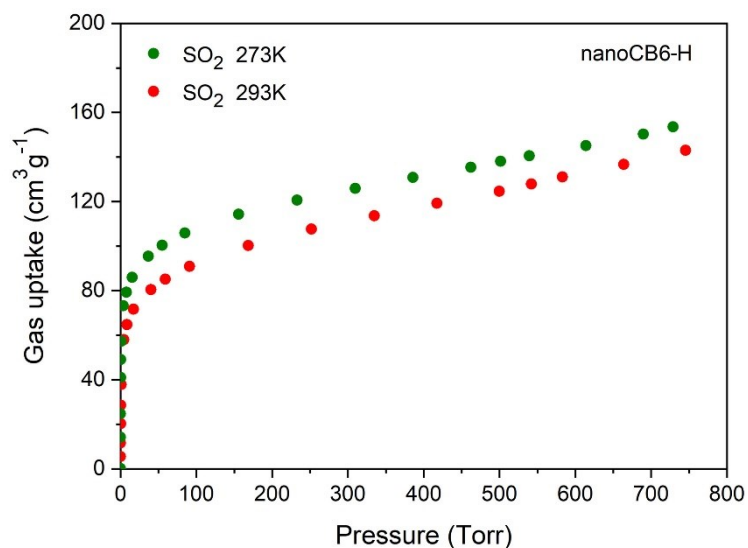

**Fig. S22** SO<sub>2</sub> adsorption isotherms (the first runs) of newly activated nanoCB6-H from the same batch measured up to 1 bar at 273 K and 293 K, respectively.

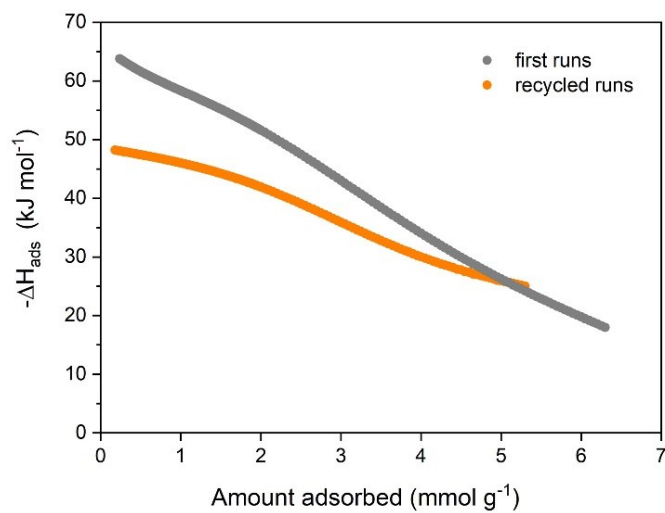

**Fig. S23** Isosteric heat of adsorption of SO<sub>2</sub> for newly activated nanoCB6-H materials (grey) based on the first runs data, and recycled nanoCB6-H materials (brown) based on the recycled 7<sup>th</sup> and 8<sup>th</sup> runs data.

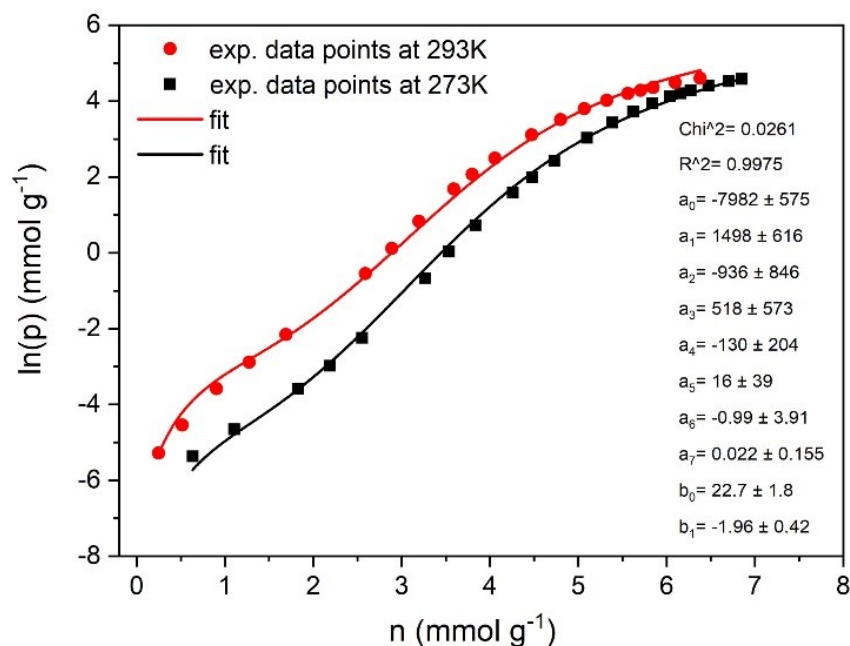

**Fig. S24** Virial analysis of the  $\text{SO}_2$  sorption data from the first runs with newly activated nanoCB6-H samples.

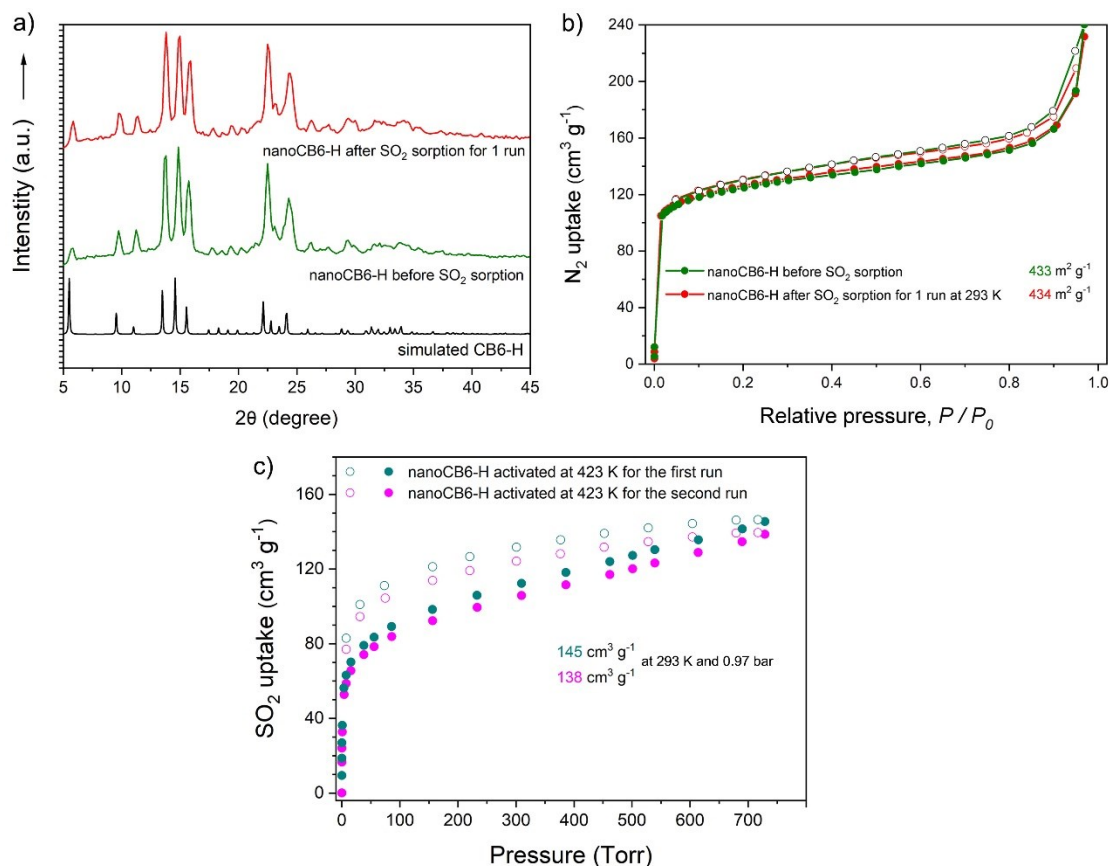

**Fig. S25** a) PXRD patterns, b)  $\text{N}_2$  sorption isotherms (77 K) of nanoCB6-H before and after  $\text{SO}_2$  sorption for the first run at 293 K. c) The  $\text{SO}_2$  sorption isotherms of nanoCB6-H for the first and second runs. Note: nanoCB6 was activated at 150 °C under a dynamic vacuum for 2 days.

There are factors, such as thermal treatment, interactions between  $\text{SO}_2$  and the framework, and residual water molecules, which can affect the BET surface areas of HOFs. If there is residual water in the HOF, the possibility is high for the formation of “ $\text{H}_2\text{SO}_3$ ”,  $\text{HSO}_3^-$ ,  $\text{SO}_3^{2-}$ ,  $\text{H}_3\text{O}^+$  etc., which is detrimental to the hydrogen-bonded

supramolecular framework during SO<sub>2</sub> adsorption. Thus, we did control experiments to investigate the effect of residual water molecules on the surface areas and SO<sub>2</sub> uptake of nanoCB6-H. The control experiment indicated that residual water molecules in nanoCB6-H could have led to the decreased surface areas after SO<sub>2</sub> sorption. According to the literature, the water guest molecules in CB6-based solids could not be totally removed at 100 °C under a dynamic vacuum for two days,<sup>7</sup> which was the same condition used for nanoCB6-H, C<sub>36</sub>H<sub>36</sub>N<sub>24</sub>O<sub>12</sub>·1.8H<sub>2</sub>O, in our manuscript. However, guest-free porous CB6-H could be prepared by evacuation of the guest molecules inside the channels at 150 °C under a dynamic vacuum for two days reported by Kim.<sup>1b</sup> Thus, we prepared water-free nanoCB6-H by activating at 150 °C under a dynamic vacuum for two days, and tested N<sub>2</sub> sorption at 77 K before and after SO<sub>2</sub> sorption up to 0.97 bar at 293 K (Fig. S25). The results showed that water-free nanoCB6-H retained the unchanged BET surface areas (434 m<sup>2</sup> g<sup>-1</sup>) after one run of SO<sub>2</sub> sorption, and the SO<sub>2</sub> uptake values were still within experimental error of 145 cm<sup>3</sup> g<sup>-1</sup> and 138 cm<sup>3</sup> g<sup>-1</sup> for the first and the second run at 293 K and 0.97 bar. This enhanced behavior by water-free nanoCB6-H over that of nanoCB6-H with residual water (Fig. 3b), indicated that the removal of residual water molecules should avoid the possible formation of “sulfurous acid” etc. during SO<sub>2</sub> sorption, which is detrimental to the HOF, and led to decreased BET surface areas after SO<sub>2</sub> sorption. We tried to use FT-IR to detect the sulfurous acid species in nanoCB6-H with residual water after SO<sub>2</sub> sorption but failed due to the low amount.

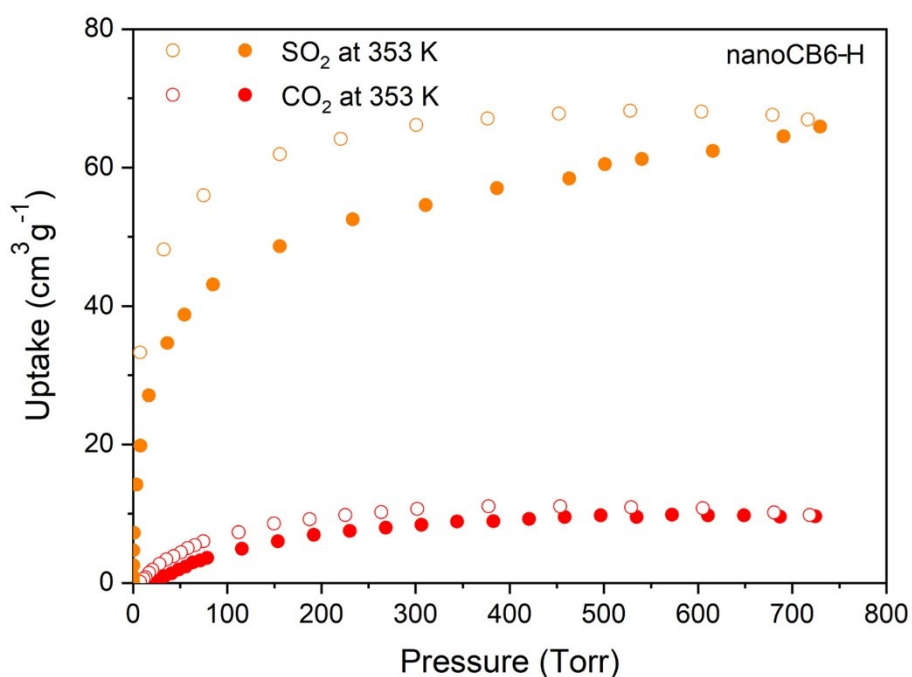

**Fig. S26** SO<sub>2</sub> and CO<sub>2</sub> uptake isotherms of recycled nanoCB6-H samples measured up to 0.97 bar at 353 K, respectively. Filled and empty symbols represent adsorption and desorption, respectively.

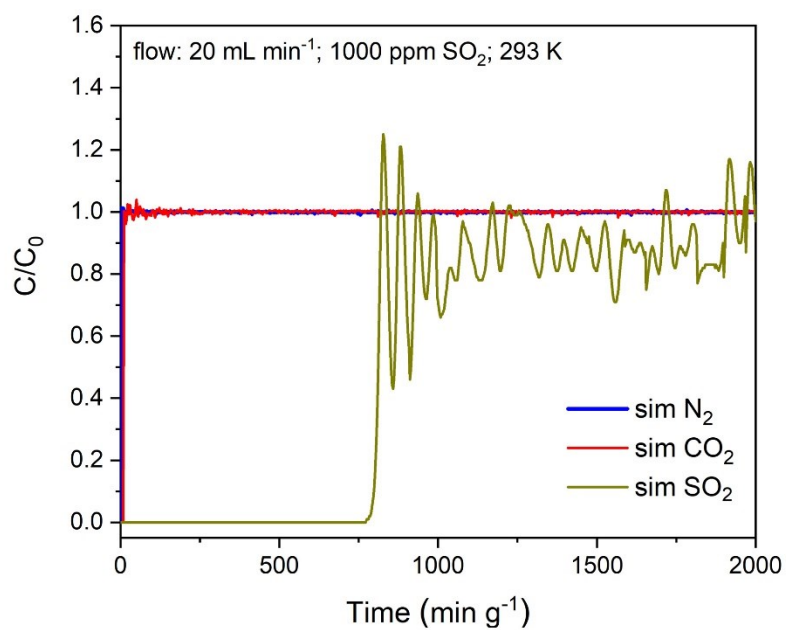

**Fig. S27** Simulated breakthrough curves for recycled nanoCB6-H with SO<sub>2</sub>/CO<sub>2</sub>/N<sub>2</sub>; 0.1/15.0/84.9; v:v:v at 293 K.

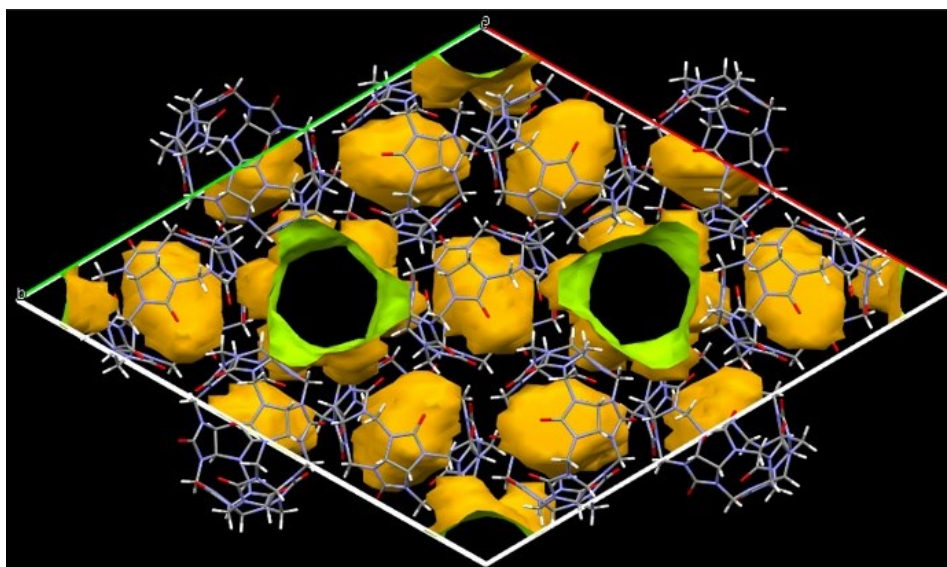

**Fig. S28** Chemical view of the void volume of CB6-H based on the accessible surface in a unit cell with a probe 1.2 Å and 0.7 Å in mercury software.

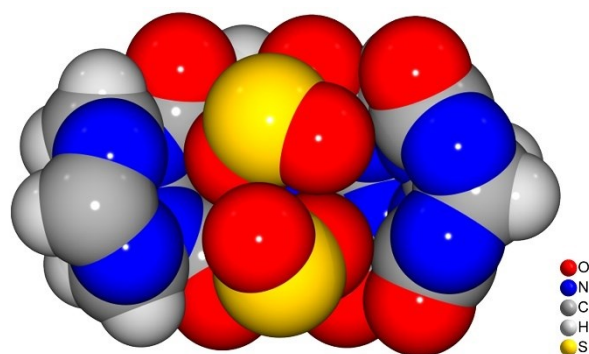

**Fig. S29** Chemical view of a pair of SO<sub>2</sub> molecules encapsulated in the intrinsic pore of a CB6 cage. CB6 is partially drawn for clarity.

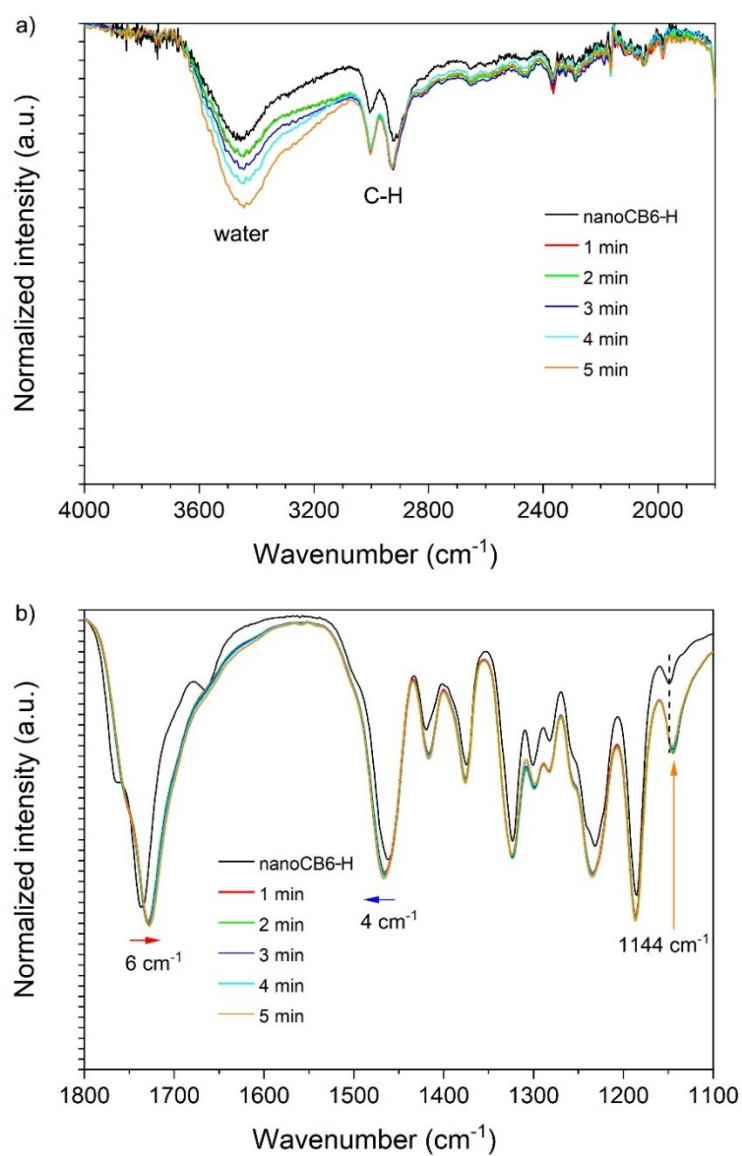

**Fig. S30** FTIR spectra of nanoCB6-H and nanoCB6-H after uptake of  $\text{SO}_2$  under atmosphere condition.

In Fig. S30a, the intensity of water signals is increasing when  $\text{SO}_2$ @nanoCB6-H is exposed to air for a certain time. In Fig. S30b, a new band at 1144  $\text{cm}^{-1}$  is assigned to the  $V_1$  symmetric stretch of adsorbed  $\text{SO}_2$ . IR signal peaks corresponding to carbonyl and methylene groups are redshifted and blue-shifted, respectively.

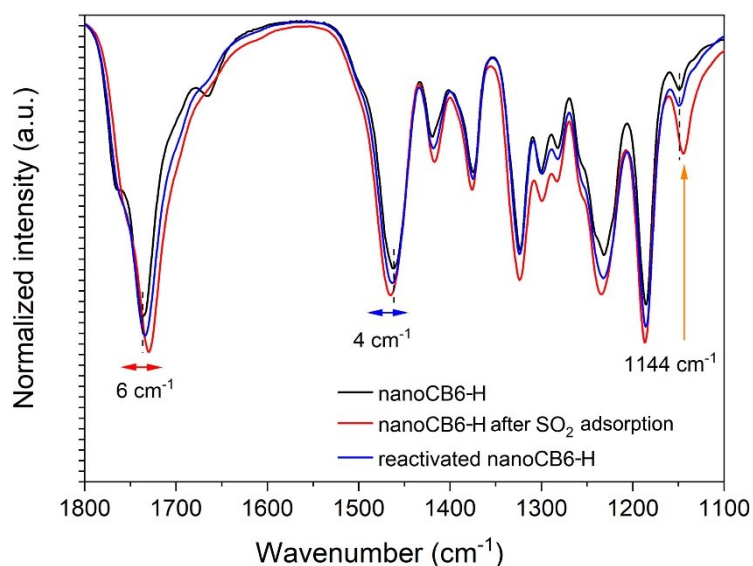

**Fig. S31** FTIR spectra of nanoCB6-H, nanoCB6-H after uptake of  $\text{SO}_2$ , and the reactivated nanoCB6-H materials.

In Fig. S31 the reversible shifted peaks in nanoCB6-H and the disappearance of  $\text{SO}_2$  signals in the reactivated nanoCB6-H indicate the release of  $\text{SO}_2$  and the successful regeneration of materials.

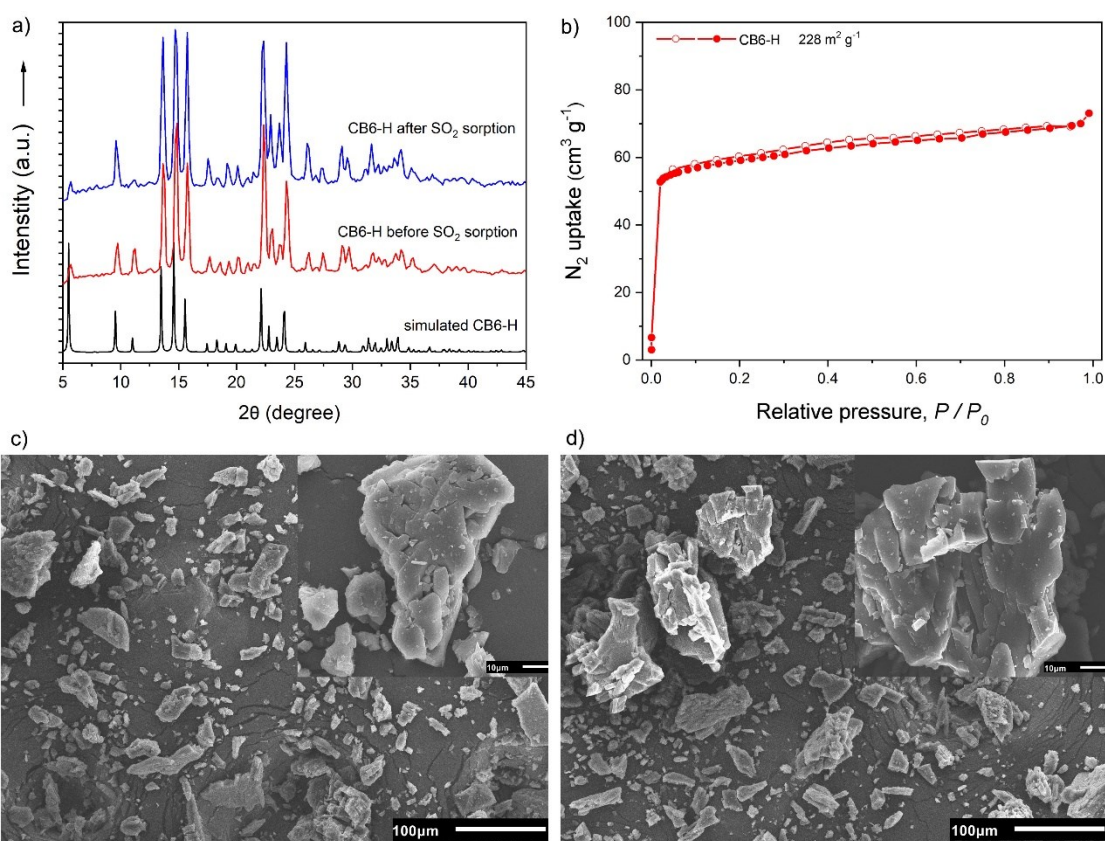

**Fig. S32** a) PXRD patterns of CB6-H before and after  $\text{SO}_2$  uptake at 293 K up to 0.97 bar. b)  $\text{N}_2$  adsorption isotherms (77 K) of CB6-H. SEM images of CB6-H c) before and d) after  $\text{SO}_2$  uptake at 293 K up to 0.97 bar.



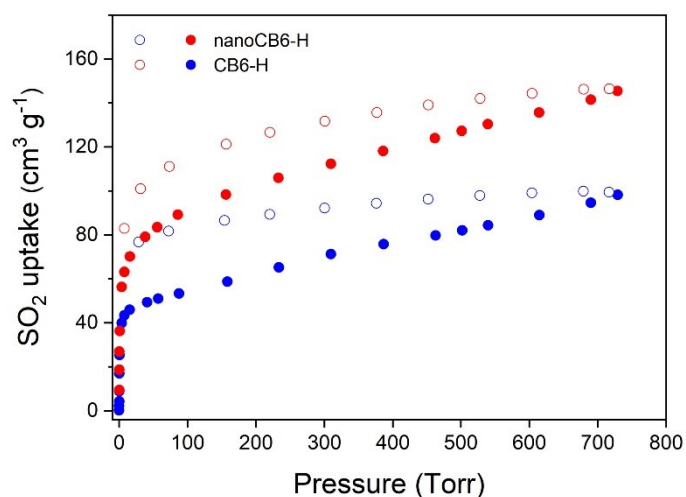

**Fig. S33** Comparison of  $\text{SO}_2$  sorption isotherms of nanoCB6-H and CB6-H up to 0.97 bar at 293 K for the first runs. Filled and empty symbols refer to adsorption and desorption, respectively.

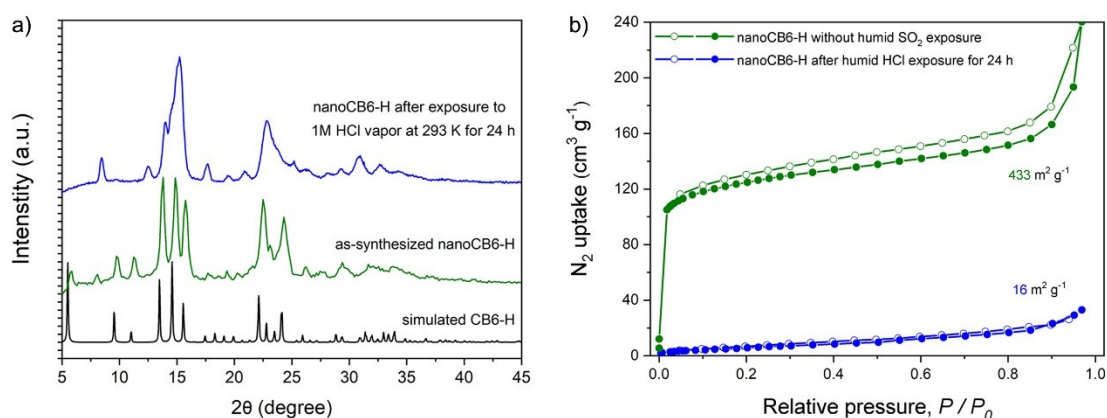

**Fig. S34** a) PXRD patterns and b)  $\text{N}_2$  adsorption isotherms (77 K) of nanoCB6-H before and after exposure to humid HCl.

Activated nanoCB6-H powders (36 mg) in a small glass bottle were exposed to humid HCl atmosphere provided by 1 M HCl aqueous solution at room temperature for 24 hours. After that, the PXRD data of treated sample was collected, and the sample was further activated at 373 K for 48 hours before  $\text{N}_2$  sorption at 77 K was measured. It is observed that the crystalline phase of nanoCB6-H has deteriorated and also changed to another unknown phase with very low BET surface areas ( $16 \text{ m}^2 \text{ g}^{-1}$ ) (Fig. S34), which indicates the extrinsic pores between CB6 cages in the HOF are almost lost under the humid acidic atmosphere.

#### S4. Table S1–S7

**Table S1.** Textural properties of nanoCB6-H before and after dry SO<sub>2</sub> adsorption.

| Sample    | S <sub>BET</sub> <sup>a</sup><br>(m <sup>2</sup> g <sup>-1</sup> ) | Langmuir<br>surface area<br>(m <sup>2</sup> g <sup>-1</sup> ) | Total pore<br>volume <sup>b</sup><br>(cm <sup>3</sup> g <sup>-1</sup> ) | Micropore<br>volume <sup>c</sup><br>(cm <sup>3</sup> g <sup>-1</sup> ) | note                                                    |
|-----------|--------------------------------------------------------------------|---------------------------------------------------------------|-------------------------------------------------------------------------|------------------------------------------------------------------------|---------------------------------------------------------|
| nanoCB6-H | 441                                                                | 545                                                           | 0.22                                                                    | 0.13                                                                   | before SO <sub>2</sub> sorption                         |
| nanoCB6-H | 383                                                                | 514                                                           | 0.21                                                                    | 0.088                                                                  | after SO <sub>2</sub> sorption<br>for ten runs at 293 K |
| CB6-H     | 228                                                                | -                                                             | 0.10                                                                    | 0.070                                                                  | before SO <sub>2</sub> sorption                         |

<sup>a</sup> BET surface area was determined over 7 points in the relative pressure range  $P/P_0 = 0.05 - 0.08$  from N<sub>2</sub> sorption isotherms at 77K.

<sup>b</sup> Total pore volumes ( $V_{total}$ ) were determined from N<sub>2</sub> sorption isotherms at 77 K ( $p/p_0 = 0.90$ ) for pores  $\leq 20$  nm diameter.

<sup>c</sup> Micropore volumes were determined using the t-plot method from five adsorption points in the pressure range  $P/P_0 = 0.1 - 0.2$  based on N<sub>2</sub> adsorption curves at 77 K.

**Table S2.** Experimental results of gas adsorption in recycled nanoCB6-H.

| SO <sub>2</sub><br>(cm <sup>3</sup> /g)<br>(mmol/g)<br>mmol/mmol<br>wt% | CO <sub>2</sub><br>(cm <sup>3</sup> /g)<br>(mmol/g)<br>mmol/mmol<br>wt% | CH <sub>4</sub><br>(cm <sup>3</sup> /g)<br>(mmol/g)<br>mmol/mmol<br>— | N <sub>2</sub><br>(cm <sup>3</sup> /g)<br>(mmol/g)<br>mmol/mmol<br>— | T (K) | Q <sub>st</sub> <sup>0</sup><br>(SO <sub>2</sub> )<br>kJ<br>mol <sup>-1</sup> | Q <sub>st</sub> <sup>0</sup><br>(CO <sub>2</sub> )<br>kJ<br>mol <sup>-1</sup> | Q <sub>st</sub> <sup>0</sup><br>(CH <sub>4</sub> )<br>kJ<br>mol <sup>-1</sup> | Q <sub>st</sub> <sup>0</sup><br>(N <sub>2</sub> )<br>kJ<br>mol <sup>-1</sup> |
|-------------------------------------------------------------------------|-------------------------------------------------------------------------|-----------------------------------------------------------------------|----------------------------------------------------------------------|-------|-------------------------------------------------------------------------------|-------------------------------------------------------------------------------|-------------------------------------------------------------------------------|------------------------------------------------------------------------------|
| 119.8                                                                   | 58                                                                      | 13.3                                                                  | 5.5                                                                  | 293   | 48                                                                            | 34.6                                                                          | 24.1                                                                          | 11.3                                                                         |
| 4.98                                                                    | 2.41                                                                    | 0.55                                                                  | 0.22                                                                 |       |                                                                               |                                                                               |                                                                               |                                                                              |
| 4.96                                                                    | 2.40                                                                    | 0.55                                                                  | 0.22                                                                 |       |                                                                               |                                                                               |                                                                               |                                                                              |
| 31.87                                                                   | 10.60                                                                   | —                                                                     | —                                                                    |       |                                                                               |                                                                               |                                                                               |                                                                              |
| 138.6                                                                   | 70.3                                                                    | 19.2                                                                  | 7.5                                                                  | 273   |                                                                               |                                                                               |                                                                               |                                                                              |
| 6.18                                                                    | 3.13                                                                    | 0.85                                                                  | 0.33                                                                 |       |                                                                               |                                                                               |                                                                               |                                                                              |
| 6.16                                                                    | 3.12                                                                    | 0.85                                                                  | 0.33                                                                 |       |                                                                               |                                                                               |                                                                               |                                                                              |
| 39.58                                                                   | 13.77                                                                   | —                                                                     | —                                                                    |       |                                                                               |                                                                               |                                                                               |                                                                              |

**Table S3.** Parameters for DSLAI modelling on different gas adsorption isotherm of recycled nanoCB6-H.

| Gas             | Temp.<br>(K) | Model | R <sup>2</sup> | affinity<br>const. 1<br>(1/bar) | max<br>loading 1<br>(mmol/g) | affinity<br>const. 2<br>(1/bar) | max<br>loading 2<br>(mmol/g) |
|-----------------|--------------|-------|----------------|---------------------------------|------------------------------|---------------------------------|------------------------------|
| SO <sub>2</sub> | 293          | DSLAI | 0.992          | 660.360                         | 3.154                        | 1.143                           | 3.989                        |
| CO <sub>2</sub> | 293          | DSLAI | 0.999          | 59.154                          | 0.605                        | 1.881                           | 3.075                        |
| CH <sub>4</sub> | 293          | DSLAI | 0.999          | 3.698                           | 0.245                        | 0.056                           | 7.835                        |
| N <sub>2</sub>  | 293          | DSLAI | 0.999          | 2.401                           | 0.073                        | 0.028                           | 7.455                        |

**Table S4.** IAST selectivity results of different gas mixtures for recycled nanoCB6-H at 293 K and 1 bar.

| Sample    | IAST selectivity <sup>a</sup>            |                                          |                                         |                                          |
|-----------|------------------------------------------|------------------------------------------|-----------------------------------------|------------------------------------------|
|           | SO <sub>2</sub> /CO <sub>2</sub> (10:90) | SO <sub>2</sub> /CH <sub>4</sub> (10:90) | SO <sub>2</sub> /N <sub>2</sub> (10:90) | CO <sub>2</sub> /CH <sub>4</sub> (10:90) |
| nanoCB6-H | 120 <sup>a</sup>                         | 662 <sup>a</sup>                         | 1720 <sup>a</sup>                       | 25 <sup>a</sup>                          |
|           | 120 <sup>b</sup>                         | 684 <sup>b</sup>                         | 1754 <sup>b</sup>                       | 25 <sup>b</sup>                          |

<sup>a</sup> Constant pressure with varied molar ratios.

<sup>b</sup> Constant molar ratio with varied pressure.

**Table S5.** SO<sub>2</sub> sorption and separation properties of nanoCB6-H and other representative adsorbents.

| sample                         | S <sub>BET</sub> (m <sup>2</sup> g <sup>-1</sup> ) | SO <sub>2</sub> uptake (cm <sup>3</sup> g <sup>-1</sup> ) |                    | Temp. (K) | SO <sub>2</sub> /CO <sub>2</sub> (molar ratio, x : y) | Q <sub>st</sub> <sup>0</sup> | ref.      |
|--------------------------------|----------------------------------------------------|-----------------------------------------------------------|--------------------|-----------|-------------------------------------------------------|------------------------------|-----------|
|                                |                                                    | 0.1 bar                                                   | 1 bar              |           |                                                       |                              |           |
| POCs                           |                                                    |                                                           |                    |           |                                                       |                              |           |
| nanoCB6-H                      | 441                                                | 88                                                        | 143.0 <sup>a</sup> | 293       | –                                                     | 64 <sup>a</sup>              | this      |
|                                | 383                                                | 81                                                        | 121.2 <sup>b</sup> | 293       | 120 (10 : 90) <sup>c</sup>                            | 48                           | work      |
| CB6-H                          | 228                                                | 50                                                        | 98                 | 293       | -                                                     | -                            | this work |
| amorphous CB7                  | 293 <sup>d</sup>                                   | 54                                                        | 105                | 297       | –                                                     | –                            | 8         |
| mPEI/ASPOC composite           | nonporous                                          | –                                                         | 12.9 <sup>e</sup>  |           | –                                                     | –                            | 9         |
| COFs                           |                                                    |                                                           |                    |           |                                                       |                              |           |
| COF–6                          | 750                                                | –                                                         | 168.5 <sup>f</sup> | 303       | 40<br>(0.05 : 99.95)                                  | 31                           | 10        |
| PI–COF–m20                     | 548                                                | –                                                         | 137.0              | 298       | –                                                     | –                            | 11        |
| PI–COF–m40                     | 279                                                | –                                                         | 134.5              | 298       | –                                                     | –                            | 11        |
| PILs                           |                                                    |                                                           |                    |           |                                                       |                              |           |
| P([VBI <sub>m</sub> ]Br)       | nonporous                                          | –                                                         | 196.5              | 298       | –                                                     | –                            | 12        |
| [IRA–900][B(Im) <sub>4</sub> ] | 13                                                 | 255                                                       | 268.9              | 293       | –                                                     | 50.6 <sup>h</sup>            | 13        |
| Zeolites                       |                                                    |                                                           |                    |           |                                                       |                              |           |
| MFI zeolite                    | 713                                                | 61.1 <sup>f</sup>                                         | 68.5 <sup>f</sup>  | 298       |                                                       | 14                           | 14        |

Note: <sup>a</sup> Data based on the first adsorption runs. <sup>b</sup> Data based on the 10th run of recycled nanoCB6-H. <sup>c</sup> Data based on IAST calculations.

<sup>d</sup> Calculated from the isotherm of CO<sub>2</sub> at 196 K. <sup>e</sup> Determined gravimetrically with 200 ppm SO<sub>2</sub> in N<sub>2</sub> as the feed mixture. <sup>f</sup> SO<sub>2</sub> uptake capacity estimated from isotherm. <sup>h</sup> Interaction energy based on DFT calculations.

**Table S6.** SO<sub>2</sub> sorption and separation properties of representative MOF adsorbents.

| sample                          | S <sub>BET</sub><br>(m <sup>2</sup> g <sup>-1</sup> ) | SO <sub>2</sub> uptake<br>(cm <sup>3</sup> g <sup>-1</sup> ) |                   | Temp.<br>(K) | SO <sub>2</sub> /CO <sub>2</sub><br>(x : y) | Q <sub>st</sub> <sup>0</sup> | ref. |
|---------------------------------|-------------------------------------------------------|--------------------------------------------------------------|-------------------|--------------|---------------------------------------------|------------------------------|------|
|                                 |                                                       | 0.1 bar                                                      | 1 bar             |              |                                             |                              |      |
| MFM-170                         | 2408                                                  | 153 <sup>a</sup>                                             | 428.1             | 298          | 28 (1 : 99) <sup>b</sup>                    | –                            | 15   |
| ELM-12                          | 706                                                   | 43.7                                                         | 61.2              | 298          | 30 (10 : 90)                                | 78                           | 16   |
| MFM-601                         | 3644                                                  | 112                                                          | 275.5             | 298          | 32 (10 : 90)                                | 38                           | 17   |
| MFM-300(In)                     | 1071                                                  | 171.2                                                        | 202.5             | 298          | 50 (10 : 90)                                | 34.5                         | 18   |
| KAUST-8                         | 258                                                   | 39.7                                                         | 70.3 <sup>a</sup> | 298          | 66<br>(0.05 : 99.95) <sup>c</sup>           | 73.9 <sup>d</sup>            | 19   |
| SIFSIX-1-Cu                     | 1178                                                  | 213.8                                                        | 269.3             | 298          | 71 (10 : 90)                                | 36.1                         | 20   |
| SIFSIX-2-Cu-i                   | 630                                                   | 147.0                                                        | 168.8             | 298          | 87.1 (10 : 90)                              | 38.1                         | 20   |
| SIFSIX-3-Zn                     | 250                                                   | 46.2                                                         | 51.3              | 298          | –                                           | 45.2                         | 20   |
| oxamato-based<br>3D MOF-2       | 1460                                                  | –                                                            | –                 | 303          | 100 (2.5 :<br>97.5)                         | –                            | 21   |
| MIL-160                         | 1070                                                  | 123.2                                                        | 161.0             | 293          | 128 (10 : 90)                               | 42                           | 22   |
| MFM-305-CH3                     | 256                                                   | 107.6                                                        | 126.2             | 298          | 125 (5 : 95)                                | 32                           | 23   |
| MFM-305                         | 779                                                   | 122.3                                                        | 171.0             | 298          | 135 (5 : 95)                                | 39                           | 23   |
| HHU-2-Br                        | 620                                                   | –                                                            | 147.9             | 293          | –                                           | –                            | 24   |
| MFM-300(Al)                     | –                                                     | –                                                            | 129.6             | 298          | –                                           | –                            | 25   |
| Prussian blue<br>analogues CoCo | 712                                                   | –                                                            | 61.1              | 298          | –                                           | –                            | 26   |
| Prussian blue<br>analogues ZnCo | 700                                                   | 13.3                                                         | 44.0              | 298          | –                                           | –                            | 26   |
| FMOF-2                          | 378                                                   | 10.8                                                         | 43.7              | 298          | –                                           | –                            | 27   |

Note: <sup>a</sup> SO<sub>2</sub> uptake capacity estimated from isotherm. <sup>b</sup> Data based on IAST calculations. <sup>c</sup> Data based on breakthrough experiment result. <sup>d</sup> Interaction energy based on DFT calculations.

**Table S7.** Representative non-covalent bonds between CB6 cage and SO<sub>2</sub> molecules, and bonding energies based on DFT calculations.

| Bond type                | Bond length (Å) | Bonding energies (kJ mol <sup>-1</sup> ) |
|--------------------------|-----------------|------------------------------------------|
| Site I                   |                 | -50.3                                    |
| S—O                      | 2.69            |                                          |
| S—O                      | 3.01            |                                          |
| (SO <sub>2</sub> ) O—H   | 2.19            |                                          |
| Site II                  |                 | -59.5                                    |
| S—O                      | 3.00            |                                          |
| S—O                      | 3.02            |                                          |
| Site III                 |                 | -82.4                                    |
| S—O                      | 3.03            |                                          |
| S—O                      | 3.04            |                                          |
| (SO <sub>2</sub> ) O—C=O | 3.13            |                                          |
| (SO <sub>2</sub> ) O—C=O | 3.15            |                                          |
| S—O (SO <sub>2</sub> )   | 3.40            |                                          |
| S—O (SO <sub>2</sub> )   | 3.40            |                                          |
| Site IV                  |                 | -49.7                                    |
| (SO <sub>2</sub> ) S—O   | 2.63            |                                          |
| (SO <sub>2</sub> ) O—C=O | 2.97            |                                          |
| (SO <sub>2</sub> ) S—N   | 3.52            |                                          |
| (SO <sub>2</sub> ) S—N   | 3.65            |                                          |
| (SO <sub>2</sub> ) O—H   | 2.64            |                                          |
| Site V                   |                 | -18.8                                    |
| (SO <sub>2</sub> ) O—H   | 2.49            |                                          |
| (SO <sub>2</sub> ) O—H   | 2.51            |                                          |
| (SO <sub>2</sub> ) O—H   | 2.80            |                                          |
| (SO <sub>2</sub> ) O—H   | 2.85            |                                          |

## S5. References

- 1 a) J. Tian, J. Liu, J. Liu and P. K. Thallapally, *CrystEngComm*, 2013, **15**, 1528–153; b) J. H. Park, K. Suh, M. R. Rohman, W. Hwang, M. Yoon and K. Kim, *Chem. Commun.*, 2015, **51**, 9313–9316; c) J. Liang, A. Nuhnen, S. Millan, H. Breitzke, V. Gvilava, G. Buntkowsky and C. Janiak, *Angew. Chem. Int. Ed.*, 2020, **59**, 6068–6073.
- 2 a) 3P INSTRUMENTS, 3P sim, Version 1.1.0.7, Simulation and Evaluation Tool for mixSorb, 3P INSTRUMENTS 2018; b) A. Möller, R. Eschrich, C. Reichenbach, J. Guderian, M. Lange and J. Möller, *Adsorption* 2017, **23**: 197–209; c) C. A. Grande, R. Blom, A. Möller and J. Möller, *Chem. Eng. Sci.*, 2013, **89**, 10–20.
- 3 M. J. Frisch, G. W. Trucks, H. B. Schlegel, G. E. Scuseria, M. A. Robb, J. R. Cheeseman, G. Scalmani, V. Barone, G. A. Petersson, H. Nakatsuji, X. Li, M. Caricato, A. V. Marenich, J. Bloino, B. G. Janesko, R. Gomperts, B. Mennucci, H. P. Hratchian, J. V. Ortiz, A. F. Izmaylov, J. L. Sonnenberg, D. Williams-Young, F. Ding, F. Lipparini, F. Egidi, J. Goings, B. Peng, A. Petrone, T. Henderson, D. Ranasinghe, V. G. Zakrzewski, J. Gao, N. Rega, G. Zheng, W. Liang, M. Hada, M. Ehara, K. Toyota, R. Fukuda, J. Hasegawa, M. Ishida, T. Nakajima, Y. Honda, O. Kitao, H. Nakai, T. Vreven, K. Throssell, J. A. Montgomery, Jr., J. E. Peralta, F. Ogliaro, M. J. Bearpark, J. J. Heyd, E. N. Brothers, K. N. Kudin, V. N. Staroverov, T. A. Keith, R. Kobayashi, J. Normand, K. Raghavachari, A. P. Rendell, J. C. Burant, S. S. Iyengar, J. Tomasi, M. Cossi, J. M. Millam, M. Klene, C. Adamo, R. Cammi, J. W. Ochterski, R. L. Martin, K. Morokuma, O. Farkas, J. B. Foresman, and D. J. Fox. *Gaussian 16, Revision A.03*; Gaussian, Inc., Wallingford CT, 2016.
- 4 K. I. Assaf and W. M. Nau, *Chem Soc Rev.*, 2015, **44**, 394–418.
- 5 S. Grimme, J. Antony, S. Ehrlich and H. Krieg, *J. Chem. Phys.* 2010, **132**, 154104–154122.
- 6 S. F. Boys and F. Bernardi, *Mol. Phys.* 1970, **19**, 553–566.
- 7 S. Lim, H. Kim, N. Selvapalam, K.-J. Kim, S. J. Cho, G. Seo and K. Kim, *Angew. Chem. Int. Ed.*, 2008, **120**, 3400–3403.
- 8 J. Tian, S. Ma, P. K. Thallapally, D. Fowler, B. P. McGrail and J. L. Atwood, *Chem. Commun.*, 2011, **47**, 7626–7628.
- 9 G. Zhu, J.-M. Y. Carrillo, A. Sujana, C. N. Okonkwo, S. Park, B. G. Sumpter, C. W. Jones and R. P. Lively, *J. Mater. Chem. A*, 2018, **6**, 22043–22052.
- 10 H. Wang, X. Zeng, W. Wang and D. Cao, *Chem. Eng. Sci.*, 2015, **135**, 373–380.
- 11 G. Y. Lee, J. Lee, H. T. Vo, S. Kim, H. Lee and T. Park, *Sci. Rep.*, 2017, **7**, 557.
- 12 L. Xia, Q. Cui, X. Suo, Y. Li, X. Cui, Q. Yang, J. Xu, Y. Yang and H. Xing, *Adv. Funct. Mater.*, 2018, **28**, 1704292.
- 13 X. He, X. Lv, X. Fan, W. Lin, H. Li and C. Wang, *Acta Phys.-Chim. Sin.*, 2018, **34**(8), 896–903.
- 14 I. Matito–Martos, A. Martín–Calvo, J. J. Gutierrez–Sevillano, M. Haranczyk, M. Doblare, J. B. Parra, C. O. Ania and S. Calero, *Phys. Chem. Chem. Phys.*, 2014, **16**, 19884–19893.
- 15 G. L. Smith, J. E. Eyley, X. Han, X. Zhang, J. Li, N. M. Jacques, H. G. W. Godfrey, S. P. Argent, L. J. McCormick McPherson, S. J. Teat, Y. Cheng, M. D. Frogley, G. Cinque, S. J. Day, C. C. Tang, T. L. Easun, S. Rudic, A. J. Ramirez–Cuesta, S. Yang and M. Schröder, *Nat. Mater.*, 2019, **18**, 1358–1365.
- 16 Y. Zhang, P. Zhang, W. Yu, J. Zhang, J. Huang, J. Wang, M. Xu, Q. Deng, Z. Zeng and S. Deng, *ACS Appl. Mater. Interfaces*, 2019, **11**, 10680–10688.
- 17 J. H. Carter, X. Han, F. Y. Moreau, I. da Silva, A. Nevin, H. G. W. Godfrey, C. C. Tang, S. Yang and M. Schröder, *J. Am. Chem. Soc.*, 2018, **140**, 15564–15567.
- 18 M. Savage, Y. Cheng, T. L. Easun, J. E. Eyley, S. P. Argent, M. R. Warren, W. Lewis, C. Murray, C. C. Tang, M. D. Frogley, G. Cinque, J. Sun, S. Rudic, R. T. Murden, M. J. Benham, A. N. Fitch, A. J. Blake, A. J. Ramirez–Cuesta, S. Yang and M. Schröder, *Adv. Mater.*, 2016, **28**, 8705–8711.
- 19 M. R. Tchalala, P. M. Bhatt, K. N. Chappanda, S. R. Tavares, K. Adil, Y. Belmabkhout, A. Shkurenko, A. Cadiou, N. Heymans, G. De Weireld, G. Maurin, K. N. Salama and M. Eddaoudi, *Nat. Commun.*, 2019, **10**, 1328.
- 20 X. Cui, Q. Yang, L. Yang, R. Krishna, Z. Zhang, Z. Bao, H. Wu, Q. Ren, W. Zhou, B. Chen and H. Xing, *Adv. Mater.*, 2017, **29**, 1606929.
- 21 M. Mon, E. Tiburcio, J. Ferrando–Soria, R. Gil San Millan, J. A. R. Navarro, D. Armentano and E. Pardo, *Chem.*

- Commun.*, 2018, **54**, 9063–9066.
- 22 P. Brandt, A. Nuhnen, M. Lange, J. Mollmer, O. Weingart, C. Janiak, *ACS App. Mater. Interfaces* 2019, **11**, 17350–17358.
- 23 L. Li, I. da Silva, D. I. Kolokolov, X. Han, J. Li, G. Smith, Y. Cheng, L. L. Daemen, C. G. Morris, H. G. W. Godfrey, N. M. Jacques, X. Zhang, P. Manuel, M. D. Frogley, C. A. Murray, A. J. Ramirez–Cuesta, G. Cinque, C. C. Tang, A. G. Stepanov, S. Yang, M. Schroder, *Chem Sci* 2019, **10**, 1472–1482.
- 24 T. Matemb Ma Ntep, H. Breitzke, L. Schmolke, C. Schlüsener, B. Moll, S. Millan, N. Tannert, I. El Aita, G. Buntkowsky, C. Janiak, *Chem. Mater.*, 2019, **31**, 8629–8638.
- 25 X. Han, H. G. W. Godfrey, L. Briggs, A. J. Davies, Y. Cheng, L. L. Daemen, A. M. Sheveleva, F. Tuna, E. J. L. McInnes, J. Sun, C. Drathen, M. W. George, A. J. Ramirez–Cuesta, K. M. Thomas, S. Yang and M. Schröder, *Nat. Mater.*, 2018, **17**, 691–696.
- 26 P. K. Thallapally, R. K. Motkuri, C. A. Fernandez, B. P. McGrail and G. S. Behrooz, *Inorg. Chem.*, 2010, **49**, 4909–4915.
- 27 C. A. Fernandez, P. K. Thallapally, R. K. Motkuri, S. K. Nune, J. C. Sumrak, J. Tian and J. Liu, *Cryst. Growth Des.*, 2010, **10**, 1037–1039.
